1 **Hidden ‘risk’ in polygenic scores: clinical use today could exacerbate health**  
2 **disparities**

3

4 Alicia R. Martin<sup>1,2,3</sup>, Masahiro Kanai<sup>1,2,3,4,5</sup>, Yoichiro Kamatani<sup>5,6</sup>, Yukinori Okada<sup>5,7,8</sup>,  
5 Benjamin M. Neale<sup>1,2,3</sup>, Mark J. Daly<sup>1,2,3,9</sup>

6

7 <sup>1</sup> Analytic and Translational Genetics Unit, Massachusetts General Hospital, Boston,  
8 MA 02114, USA

9 <sup>2</sup> Program in Medical and Population Genetics, Broad Institute of Harvard and MIT,  
10 Cambridge, MA 02142, USA

11 <sup>3</sup> Stanley Center for Psychiatric Research, Broad Institute of Harvard and MIT,  
12 Cambridge, MA 02142, USA

13 <sup>4</sup> Department of Biomedical Informatics, Harvard Medical School, Boston, MA 02115,  
14 USA

15 <sup>5</sup> Laboratory for Statistical Analysis, RIKEN Center for Integrative Medical Sciences,  
16 Yokohama 230-0045, Japan

17 <sup>6</sup> Kyoto-McGill International Collaborative School in Genomic Medicine, Graduate  
18 School of Medicine, Kyoto University, Kyoto 606-8507, Japan

19 <sup>7</sup> Department of Statistical Genetics, Osaka University Graduate School of Medicine,  
20 Suita 565-0871, Japan

21 <sup>8</sup> Laboratory of Statistical Immunology, Immunology Frontier Research Center (WPI-  
22 IFRc), Osaka University, Suita 565-0871, Japan

23 <sup>9</sup> Institute for Molecular Medicine Finland (FIMM), University of Helsinki, Helsinki,

24 Finland

25

26 **Abstract**

27

28 Polygenic risk scores have the potential to improve health outcomes for a variety of  
29 complex diseases and are poised for clinical translation, driven by the low cost of  
30 genotyping (<\$50 per person), the ability to predict genetic risk of many diseases with a  
31 single test, and the dramatically increasing scale and power of genetic studies that aid  
32 prediction accuracy. However, the major *ethical* and *scientific* challenge surrounding  
33 clinical implementation is the observation that they are currently of far greater predictive  
34 value in individuals of recent European ancestry than others. The better performance of  
35 such risk scores in European populations is an inescapable consequence of the heavily  
36 biased makeup of genome-wide association studies, with an estimated 79% of  
37 participants in all existing genetic studies being of European descent. Empirically,  
38 polygenic risk scores perform far better in European populations, with prediction  
39 accuracy reduced by approximately 2- to 5-fold in East Asian and African American  
40 populations, respectively. This highlights that—unlike specific clinical biomarkers and  
41 prescription drugs, which may individually work better in some populations but do not  
42 ubiquitously perform far better in European populations—clinical uses of prediction today  
43 would systematically afford greater improvement to European populations. Early  
44 diversifying efforts, however, show promise in levelling this vast imbalance, even when  
45 non-European sample sizes are considerably smaller than the best-powered studies to

46 date. Polygenic risk scores provide a new opportunity to improve health outcomes for  
47 many diseases in all populations, but to realize this full potential equitably, we must  
48 prioritize greater inclusivity of diverse study participants in genetic studies and open  
49 access to resulting summary statistics to ensure that health disparities are not increased  
50 for those already most underserved.

51

52 **Keywords:** health disparities, genetic risk prediction, polygenic risk scores, diversity,  
53 population genetics, statistical genetics

54

55 Polygenic risk scores (PRS), which predict traits using genetic data, are of burgeoning  
56 interest to the clinical community as researchers demonstrate their growing power to  
57 improve clinical care, genetic studies of a wide range of phenotypes increase in size  
58 and power, and genotyping costs plummet to less than US\$50. Many earlier criticisms  
59 of limited prediction power are now recognized to have been chiefly an issue of small  
60 sample size, which is no longer the case for many outcomes <sup>1</sup>. For example, integrated  
61 models of PRS together with other lifestyle and clinical factors have enabled clinicians  
62 to more accurately quantify the risk of heart attack for patients; consequently, they have  
63 more effectively targeted the reduction of LDL cholesterol and by extension heart attack  
64 by prescribing statins to patients at the greatest overall risk of cardiovascular disease <sup>2-</sup>  
65 <sup>6</sup>. While we share enthusiasm about the potential of PRS to improve health outcomes  
66 through their eventual routine implementation as clinical biomarkers, we consider the  
67 consistent observation that they are currently of far greater predictive value in  
68 individuals of recent European descent than in others to be the major *ethical* and

69 *scientific* challenge surrounding clinical translation and, at present, the most critical  
70 limitation to genetics in precision medicine. The scientific basis of this imbalance has  
71 been demonstrated in population genetics simulations, theoretically, and empirically  
72 across many traits and diseases <sup>7-18</sup>.

73  
74 All studies to date using well-powered genome-wide association studies (GWAS) to  
75 assess the predictive value of PRS in European and non-European descent populations  
76 have made a consistent observation: PRS predict individual risk far better in Europeans  
77 than non-Europeans. In complex traits including height, body mass index (BMI),  
78 educational attainment, schizophrenia, and major depression, existing PRS computed  
79 with the largest available GWAS results predict outcomes far more accurately in new  
80 samples of European-descent than they do in non-Europeans, with the clearest study  
81 examples in East Asians and African Americans <sup>11,12,14-20</sup>. Rather than chance or  
82 biology, this is a predictable consequence of the fact that the genetic discovery efforts to  
83 date heavily overrepresent European populations globally. The correlation between true  
84 and genetically predicted phenotypes decays with genetic divergence from the makeup  
85 of the discovery GWAS, meaning that the accuracy of polygenic scores in different  
86 populations is highly dependent on the study population representation in the largest  
87 existing ‘training’ GWAS. Here, we document study biases that underrepresent non-  
88 European populations in current GWAS, and explain the fundamental concepts  
89 contributing to reduced phenotypic variance explained with increasing genetic  
90 divergence from populations included in GWAS.

91

## 92 **Predictable basis of disparities in polygenic risk score accuracy**

93 The lack of generalizability of genetic studies across global populations arises from the  
94 overwhelming abundance of European descent studies—according to the GWAS  
95 catalog<sup>21-24</sup>, ~79% of all GWAS participants are of European descent despite making  
96 up only 16% of the global population (**Figure 1**). More concerning, the fraction of non-  
97 European individuals in GWAS has stagnated or declined since late 2014 (**Figure 1**),  
98 suggesting that we are not on a trajectory to correct this imbalance. These numbers  
99 provide a composite metric of study availability, accessibility, and use—i.e., cohorts that  
100 have been included in numerous studies are represented multiple times, which may  
101 disproportionately include cohorts of European descent. The relative sample  
102 compositions of GWAS result in highly predictable disparities in prediction accuracy;  
103 statistical and population genetics theory predicts that genetic risk prediction accuracy  
104 will decay with increasing genetic divergence between the original GWAS sample and  
105 target of prediction, a function of population history<sup>9,10</sup>. This pattern can be attributed to  
106 several statistical observations which we detail below: 1) GWAS favor the discovery of  
107 genetic variants that are common in the study population; 2) linkage disequilibrium (LD)  
108 differentiates marginal effect size estimates for highly polygenic traits across  
109 populations, even when causal variants are the same; and 3) demographic and  
110 environmental differences may drive differential forces of natural selection that in turn  
111 drive differences in causal genetic architecture. Of note, the first two of these degrade  
112 prediction performance across populations substantially even when there exist no  
113 biological, environmental, or diagnostic differences.

114

115 *Common discoveries and low-hanging fruit*

116 First, the power to discover an association in a genetic study depends on the effect size  
117 and frequency of the variant<sup>25</sup>. This power dependence means that the most significant  
118 associations tend to be more common in the populations in which they are discovered  
119 than in other populations<sup>9,26</sup>. For example, GWAS catalog variants are on average  
120 more common in European populations compared to East Asian and African  
121 populations (**Figure 2B**), an observation not representative of genomic variants at large.  
122 Understudied populations offer low-hanging fruit for genetic discovery because variants  
123 that are common in these groups but rare or absent in European populations could not  
124 be discovered even with very large European sample sizes. Some examples include  
125 *SLC16A11* and *HNF1A* associations with type II diabetes in Latino populations, *APOL1*  
126 associations with end-stage kidney disease, and associations with prostate cancer in  
127 African descent populations<sup>27-30</sup>. If we assume that causal genetic variants have an  
128 equal effect across all populations—an assumption with some empirical support that  
129 offers the best case scenario for transferability<sup>31-35</sup>—Eurocentric GWAS biases mean  
130 that variants that are common in European populations are preferentially discovered  
131 and associated with risk, and thus account for a larger fraction of the variance in  
132 polygenic risk<sup>9</sup>. Furthermore, imputation reference panels share the same biases as in  
133 GWAS, and imputing sites that are common in European populations but rarer in other  
134 populations is challenging when the catalog of non-European haplotypes is substantially  
135 smaller. These issues are insurmountable through statistical methods alone, but rather  
136 motivate substantial investments in more diverse populations to produce similar-sized

137 GWAS of biomedical phenotypes as well as sequenced reference panels in other  
138 populations.

139

140 *Linkage disequilibrium*

141 Second, the correlation structure of the human genome, i.e. LD, varies across  
142 populations due to demographic history (**Figure 2A,C-E**). These LD differences in turn  
143 drive differences in effect size estimates (i.e. predictors) from GWAS across  
144 populations, even when causal effects are the same. (Mathematically, the marginal  
145 GWAS estimate  $\hat{\beta}_j = \sum_{k=1}^m r_{j,k} \beta_k + \epsilon_j$ , where  $\hat{\beta}_j$  are effect size estimates at SNP  $j$ ,  $r_{j,k}$  is  
146 pairwise SNP LD between SNPs  $j$  and  $k$ ,  $\beta_k$  is the causal SNP effect at nearby SNP  $k$ ,  
147 and  $\epsilon$  is residual error from bias or noise). While differences in effect size estimates due  
148 to LD differences may typically be small for most regions of the genome, PRS sum  
149 across these effects, also aggregating these population differences. Statistical methods  
150 that account for LD differences across populations may help improve risk prediction  
151 accuracy within each population. While empirical studies suggest that causal effect  
152 sizes tend to be shared<sup>31,32</sup>, it may not be feasible to fine-map most variants to a single  
153 locus to solve issues of low generalizability, even with very large GWAS (i.e., millions).  
154 This is because complex traits are highly polygenic, meaning most of our prediction  
155 power comes from small effects that do not meet genome-wide significance and/or  
156 cannot be fine-mapped, even in the best-powered GWAS to date<sup>36</sup>.

157

158 *History, selection, the environment, and complex interactions*

159 Lastly, other environmental, demographic, and cohort considerations may further  
160 worsen prediction accuracy differences across populations in less predictable ways.  
161 GWAS ancestry study biases and LD differences across populations are extremely  
162 challenging to address, but these issues actually make many favorable assumptions  
163 that all causal loci have the same impact and are under equivalent selective pressure in  
164 all populations. In contrast, other effects on polygenic adaptation or risk scores such as  
165 natural selection can impact populations differently based on their unique histories.  
166 Additionally, residual uncorrected population stratification may impact risk prediction  
167 accuracy across populations, but the magnitude of its effect is currently unclear. These  
168 effects are particularly challenging to disentangle, as has clearly been demonstrated for  
169 height, where evidence of polygenic adaptation is under question<sup>37,38</sup>. Comparisons of  
170 geographically stratified phenotypes like height across populations with highly divergent  
171 genetic backgrounds and mean environmental differences, such as differences in  
172 resource abundance during development across continents, are especially prone to  
173 uninterpretable results<sup>39</sup>. Related to stratification, most polygenic scoring methods do  
174 not explicitly address recent admixture and none consider recently admixed individuals'  
175 unique local mosaic of ancestry—further methods development in this space is needed.  
176 Furthermore, comparing PRS across environmentally stratified cohorts, such as in some  
177 biobanks with healthy volunteer effects versus disease study datasets or hospital-based  
178 cohorts, requires careful consideration of technical differences, collider bias, as well as  
179 variability in baseline health status among studies. It is also important to consider  
180 differences in clinical definition of the phenotypes and heterogeneous constitution of  
181 sub-phenotypes among countries.



182  
183 Differences in environmental exposure, gene  $\times$  environment interactions, historical  
184 population size dynamics, and other factors will further limit generalizability for genetic  
185 risk scores in an unpredictable, trait-specific fashion <sup>40,41</sup>. While non-linear genetic  
186 factors explain little variation in complex traits beyond a purely additive model <sup>42</sup>, some  
187 unrecognized nonlinearities and gene  $\times$  gene interactions can also induce genetic risk  
188 prediction challenges, as pairwise interactions are likely to vary more across  
189 populations than individual SNPs. Mathematically, we can simplistically think of this in  
190 terms of a two-SNP model, in which the sum of two SNP effects is likely to explain more  
191 phenotypic variance than the product of the same SNPs. Some machine learning  
192 approaches may thus modestly improve genetic prediction accuracy for some  
193 phenotypes <sup>43</sup>, but these approaches are most likely to improve prediction accuracy for  
194 atypical traits with simpler architectures, known interactions, and poor prediction  
195 generalizability across populations, such as skin pigmentation <sup>44</sup>.

196

### 197 **Limited generalizability of genetic prediction across diverse populations**

198 Previous work has assessed prediction accuracy across diverse populations in several  
199 traits and diseases for which GWAS summary statistics are available. These  
200 assessments are becoming increasingly feasible with the growth and public availability  
201 of global biobanks for quantitative traits as well as diversifying priorities from funding  
202 agencies <sup>45,46</sup>. As of yet, multi-ethnic work has been slow in most disease areas <sup>47</sup>,  
203 limiting even the opportunity to assess prediction utility in non-European cohorts.  
204 Nonetheless, we have assembled prediction accuracy statistics from several studies

205 using the largest European GWAS to predict several phenotypes in target European  
206 and non-European cohorts. For example, multiple schizophrenia studies consistently  
207 predicted risk on average 2.2-fold worse in East Asians relative to Europeans, (i.e.  
208  $\mu=0.46$ ,  $\sigma=0.06$ ), using summary statistics from a Eurocentric GWAS<sup>11,14</sup> (**Figure 3**),  
209 despite the fact that there is no genetic heterogeneity in schizophrenia between the two  
210 populations. This finding is even more pronounced in African Americans, where genetic  
211 divergence from Europeans is greater than between Europeans and East Asians<sup>26</sup>.  
212 Across several phenotypes with a range of genetic architectures in which empirical  
213 evaluations were available, including BMI, educational attainment, height, and  
214 schizophrenia, prediction accuracy using European GWAS summary statistics was on  
215 average 4.5-fold less accurate in African Americans than in Europeans (i.e.  $\mu=0.22$ ,  
216  $\sigma=0.09$ , **Figure 3**)<sup>11,12,15-18</sup>. By extension, prediction accuracy is expected to be even  
217 lower in African Americans with higher than average African ancestry or among  
218 populations with greater divergence from Europeans (e.g. some southern African  
219 populations). These enormous disparities are not simply methodological issues, as  
220 various approaches (e.g. pruning and threshold versus LDpred) and accuracy metrics  
221 ( $R^2$  for quantitative traits and various pseudo- $R^2$  metrics for binary traits) illustrate this  
222 consistently poorer performance in populations distinct from the discovery sample  
223 across a range of polygenic traits (**Table S2**).

224

### 225 **Prioritizing diversity shows early promise for polygenic prediction**

226 Early diversifying GWAS efforts have been especially productive for informing on these  
227 questions surrounding risk prediction. Rather than varying the prediction target dataset,

228 some GWAS in diverse populations have increased the scale of non-European  
229 summary statistics and also varied the study dataset in multi-ethnic PRS studies. For  
230 example, a BioBank Japan GWAS study (N=158,284) showed that compared to a 2x  
231 larger European GWAS (N=322,154), the variance in BMI explained in an independent  
232 Japanese cohort with Japanese GWAS summary statistics was on average 1.5-fold  
233 greater than with European GWAS summary statistics ( $R^2=0.154$  vs  $0.104$  at  $p < 0.05$ ,  
234 respectively)<sup>19</sup>. Similarly, a Chinese schizophrenia study (N=7,699 cases and 18,327  
235 controls) showed that compared to an effectively 5-fold larger European GWAS  
236 (N=36,989 cases, 113,075 controls), prediction accuracy in an independent Chinese  
237 cohort with GWAS summary statistics from China far surpassed prediction accuracy  
238 from European summary statistics by 2.6-fold (2.3% versus 6.2%)<sup>20</sup>. Thus, even when  
239 studies in non-European populations are only a fraction the size of the largest European  
240 study, they are likely to have disproportionate value for predicting polygenic traits in  
241 other individuals of similar ancestry.

242  
243 Given this background, we performed a systematic evaluation of polygenic prediction  
244 accuracy across 17 quantitative anthropometric and blood panel traits in British and  
245 Japanese individuals<sup>19,48,49</sup> by performing GWAS with the exact same sample sizes in  
246 each population. We symmetrically demonstrate that prediction accuracy is consistently  
247 higher with GWAS summary statistics from ancestry-matched summary statistics  
248 (**Figure 4**). Keeping in mind issues of comparability described above, we note that the  
249 BioBank Japan (BBJ) is a hospital-based cohort, whereas UK Biobank (UKBB) is a  
250 healthier than average population-based cohort, and that differences in observed

251 heritability among these cohorts (rather than among populations) likely explain lower  
252 prediction accuracy from the BBJ GWAS summary statistics (**Table S3**). Some  
253 statistical fluctuations in the relative differences in prediction accuracy across  
254 populations are likely driven by differences in trans-ethnic genetic correlation (i.e.  
255 comparing across ancestries the estimated correlation of common variant effect sizes at  
256 SNPs common in both populations via Popcorn) and/or differences in heritability  
257 measured in each population (**Figure S1, Table S3**). Prediction accuracy was far lower  
258 in individuals of African descent in the UK Biobank (**Figure S5**) using GWAS summary  
259 statistics from European or Japanese ancestry individuals (**Figure 4**). These population  
260 studies demonstrate the power and utility of increasingly diverse GWAS for prediction,  
261 especially in populations of non-European descent.

262  
263 While many other traits and diseases have been studied in multi-ethnic settings, few  
264 have reported comparable metrics of prediction accuracy across populations.  
265 Cardiovascular research, for example, has led the charge towards clinical translation of  
266 PRS <sup>1</sup>. This enthusiasm is driven by observations that a polygenic burden of LDL-  
267 increasing SNPs can confer monogenic-equivalent risk of cardiovascular disease, with  
268 polygenic scores improving clinical models for risk assessment and statin prescription  
269 that can reduce coronary heart disease and improve healthcare delivery efficiency <sup>2,3,5</sup>.  
270 However, many of these studies have been conducted exclusively in European descent  
271 populations, with few studies rigorously evaluating population-level applicability to non-  
272 Europeans. Those existing findings indeed demonstrate a large reduction in prediction  
273 utility in non-European populations <sup>7</sup>, though often with comparisons of odds ratios

274 among arbitrary breakpoints in the risk distribution that make comparisons across  
275 studies challenging. To better clarify how polygenic prediction will be deployed in a  
276 clinical setting with diverse populations, more systematic and thorough evaluations of  
277 the utility of PRS within and across populations for many complex traits are still needed.  
278 These evaluations would benefit from rigorous polygenic prediction accuracy  
279 evaluations, especially for diverse non-European patients<sup>50-52</sup>.

280

### 281 **Translational genetic prediction may uniquely exacerbate disparities**

282 Our impetus for raising these statistical issues limiting the generalizability of PRS across  
283 population stems from our concern that, while they are legitimately clinically promising  
284 for improving health outcomes for many biomedical phenotypes, they may have a larger  
285 potential to raise health disparities than other clinical factors for several reasons. The  
286 opportunities they provide for improving health outcomes means they inevitably will and  
287 should be pursued in the near term, but we urge that a concerted prioritization to make  
288 GWAS summary statistics easily accessible for diverse populations and a variety of  
289 traits and diseases is imperative, even when they are a fraction the size of the largest  
290 existing European datasets. *Individual* clinical tests, biomarkers, and prescription drug  
291 efficacy may vary across populations in their utility, but are fundamentally informed by  
292 the same underlying biology<sup>53,54</sup> Currently, guidelines state that as few as 120  
293 individuals define reference intervals for clinical factors (though often smaller numbers  
294 from only one subpopulation are used) and there is no clear definition of who is “normal”  
295<sup>53</sup>. Consequently, reference intervals for biomarkers can sometimes deviate  
296 considerably by reported ethnicity<sup>55-57</sup>. Defining ethnicity-specific reference intervals is

297 clearly an important problem that can provide fundamental interpretability gains with  
298 implications for some major health benefits (e.g. need for dialysis and development of  
299 Type 2 diabetes based on ethnicity-specific serum creatinine and hemoglobin A1C  
300 reference intervals, respectively)<sup>56</sup>. Simply put, some biomarkers or clinical tests scale  
301 directly with health outcomes independent of ancestry, and many others may have  
302 distributional differences by ancestry but are equally valid after centering with respect to  
303 a readily collected population reference.

304  
305 In contrast, PRS are uniformly less useful in understudied populations due to  
306 differences in genomic variation and population history<sup>9,10</sup>. No analogous solution of  
307 defining ethnicity-specific reference intervals would ameliorate health disparities  
308 implications for PRS or fundamentally aid interpretability in non-European populations.  
309 Rather, as we and others demonstrate, PRS are unique in that even with multi-ethnic  
310 population references, these scores are fundamentally less informative in populations  
311 more diverged from GWAS study cohorts.

312  
313 The clinical use and deployment of genetic risk scores needs to be informed by the  
314 issues surrounding tests that currently would unequivocally provide much greater  
315 benefit to the subset of the world's population which is already on the positive end of  
316 healthcare disparities\*. Conversely, African descent populations, which already endure  
317 many of the largest health disparities across the globe, are often predicted marginally  
318 better, if at all, compared to random (**Figure 4**). They are therefore least likely to benefit

---

\* To maximally benefit all populations, the largest existing GWAS results should be used. Downsampling European GWAS for the sake of parity results in worse predictors for all individuals.

319 from improvements in precision healthcare delivery from genetic risk scores with  
320 existing data due to human population history and study biases. This is a major concern  
321 globally and especially in the U.S., which already leads other middle- and high-income  
322 countries in both real and perceived healthcare disparities<sup>58</sup>. Thus, we would strongly  
323 urge that any discourse on clinical use of polygenic scores include a careful,  
324 quantitative assessment of the economic and health disparities impacts on  
325 underrepresented populations that might be unintentionally introduced by the use of  
326 PRS and raise awareness about how to eliminate these disparities.

327

### 328 **How do we even the ledger?**

329 What can be done? An equal investment in GWAS across all major ancestries and  
330 global populations is the most obvious solution to truly generate a substrate for equally  
331 informative risk scores, but is not likely to occur any time soon absent a dramatic priority  
332 shift given the current imbalance and stalled diversifying progress over the last five  
333 years (**Figure 1**). While it may be challenging or in some cases infeasible to acquire  
334 sample sizes large enough for PRS to be equally informative in all populations, some  
335 much-needed efforts towards increasing diversity in genomics that support open sharing  
336 of GWAS summary data from multiple ancestries are underway. Examples include the  
337 *All of Us* Research Program, the Population Architecture using Genomics and  
338 Epidemiology (PAGE) Consortium, as well as some disease-focused consortia, such as  
339 the T2D-genes and Stanley Global initiatives on the genetics of type II diabetes and  
340 psychiatric disorders, respectively. The prerequisite data for dramatically increasing  
341 diversity also hypothetically exist in several large-scale publicly funded datasets such as

342 the Million Veterans Project and Trans-Omics for Precision Medicine (TOPMed), but  
343 with problematic data access issues in which even summary data from GWAS within  
344 and across populations are not publicly shared. While there is an understandable  
345 patient privacy balance to strike when sharing individual-level data, GWAS summary  
346 statistics by population from all publicly funded and as many privately funded projects  
347 as possible should be made easily and publicly accessible to improve global health  
348 outcomes. Efforts to unify phenotype definitions, normalization approaches, and GWAS  
349 methods among studies are also encouraged.

350  
351 To enable progress towards parity, it will be critical that open data sharing standards be  
352 adopted for all ancestries and for genetic studies of all sample sizes, not just the largest  
353 European results. Locally appropriate and secure genetic data sharing techniques as  
354 well as equitable technology availability will need to be adopted widely in Asia and  
355 Africa as they are in Europe and North America, to ensure that maximum value is  
356 achieved from existing and ongoing efforts that are being developed to help counter the  
357 current imbalance. Methodological improvements that better define risk scores by  
358 accounting for population allele frequency, LD, and/or admixture differences  
359 appropriately are underway and may help considerably, but will not by themselves bring  
360 equality. All of these efforts are important and should be prioritized not just for risk  
361 prediction but more generally to maximize the use and applicability of genetics to inform  
362 on the biology of disease. Given the acute recent attention on clinical use of PRS, we  
363 believe it is paramount to recognize their potential to improve health outcomes for all  
364 individuals and many complex diseases. Simultaneously, we as a field must address the



365 disparity in utility in an ethically thoughtful and scientifically rigorous fashion, lest we  
366 inadvertently enable genetic technologies to contribute to, rather than reduce, existing  
367 health disparities.

368

### 369 **Acknowledgments**

370 We thank Amit Khera for helpful discussions. We also thank Michiaki Kubo, Yoshinori  
371 Murakami, and Masato Akiyama for their support in the BioBank Japan Project analysis.

372 This work was supported by funding from the National Institutes of Health  
373 (K99MH117229 to A.R.M.). UK Biobank analyses were conducted via application  
374 31063. The BioBank Japan Project was supported by the Tailor-Made Medical  
375 Treatment Program of the Ministry of Education, Culture, Sports, Science, and  
376 Technology (MEXT) and the Japan Agency for Medical Research and Development  
377 (AMED). M.K. was supported by a Nakajima Foundation Fellowship and the Masason  
378 Foundation.

379

### 380 **Figures**

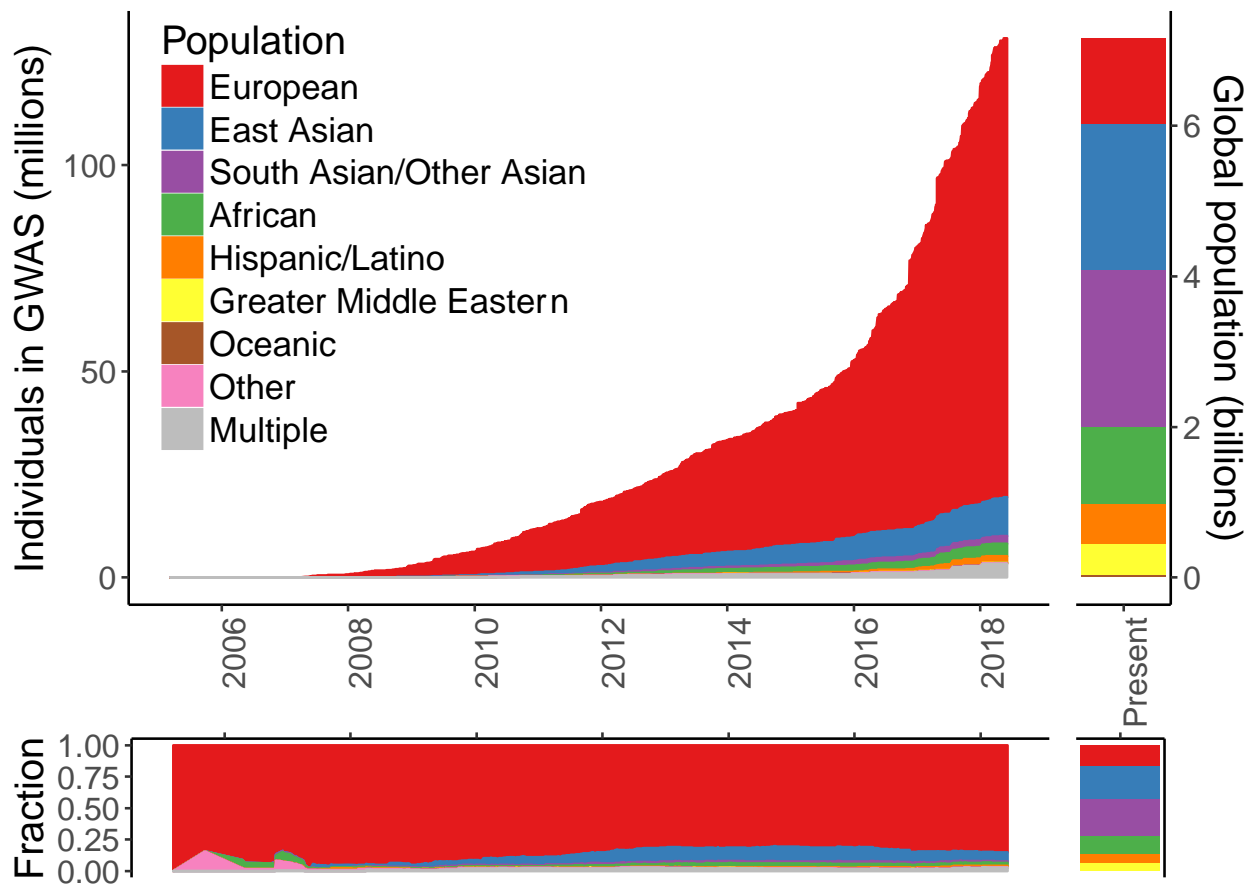

381

382 **Figure 1 – Ancestry of GWAS participants over time compared to the global**

383 **population.** Cumulative data as reported by the GWAS catalog<sup>23</sup>. A notable caveat is

384 that because some cohorts are included in numerous studies, some individuals are

385 represented multiple times. This bias in multiple counting is especially likely for publicly

386 available cohorts, which are more likely to be of European or East Asian descent.

387 Individuals whose ancestry is “not reported” are not shown.

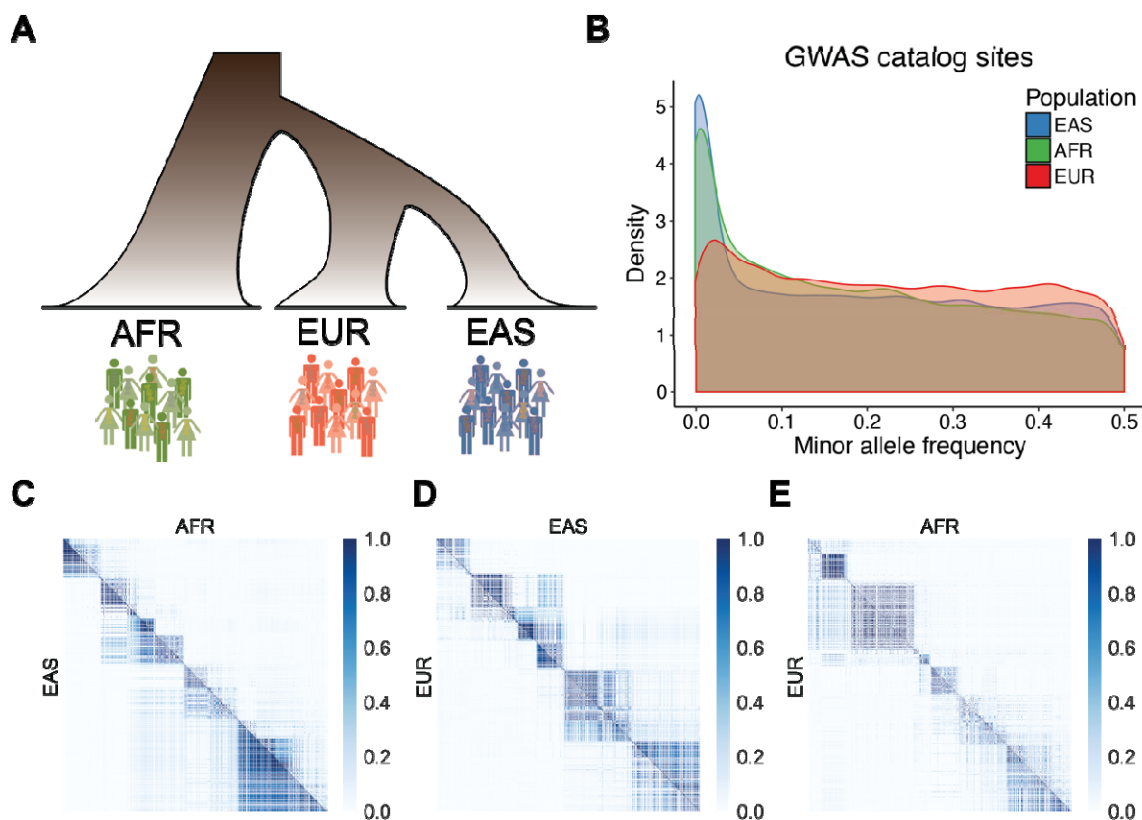

388

389 **Figure 2 – Demographic relationships, allele frequency differences, and local LD**

390 **patterns between population pairs.** Data analyzed from 1000 Genomes, in which

391 population labels are: AFR = continental African, EUR = European, and EAS = East

392 Asian. A) Cartoon relationships among AFR, EUR, and EAS populations. B) Allele

393 frequency distributions in AFR, EUR, and EAS populations of variants from the GWAS

394 catalog. C-E) Color axis shows LD scale ( $r^2$ ). LD comparisons between pairs of

395 populations show the same region of the genome for each comparison (representative

396 region is chr1, 51572kb-52857kb) among pairs of SNPs polymorphic in both

397 populations, illustrating that different SNPs are polymorphic across some population

398 pairs, and that these SNPs have variable LD patterns across populations.

399

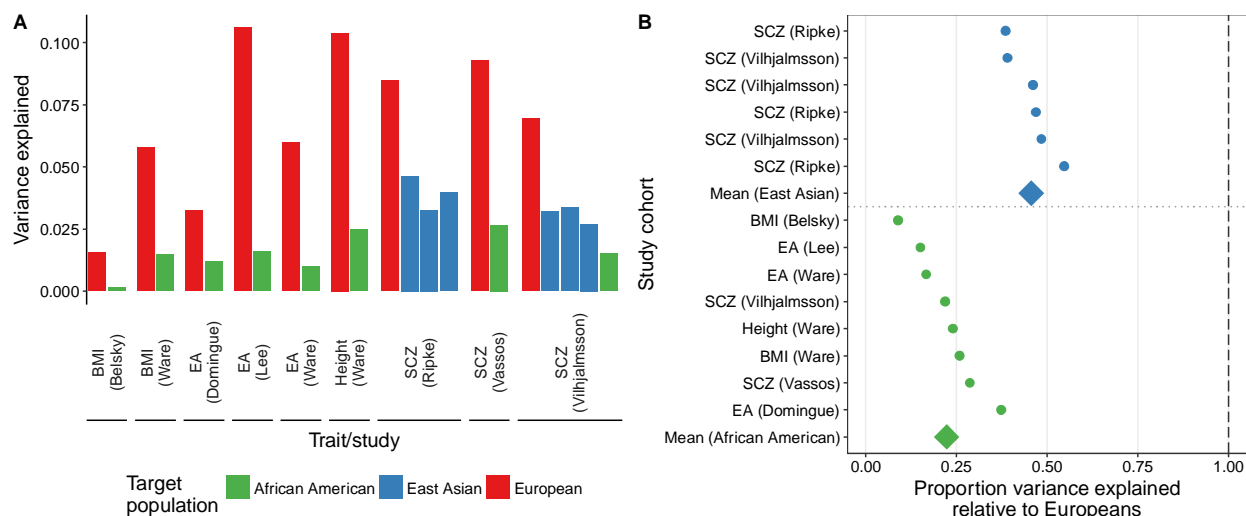

400 **Figure 3 – Empirical comparison of phenotypic variance explained across**  
 401 **populations using polygenic scores computed with European GWAS.** All GWAS  
 402 studies included here were conducted in European ancestry populations, with PRS  
 403 calculated and evaluated in independent European, East Asian, and African American  
 404 target cohorts. The European study biases result in the highest prediction accuracies in  
 405 independent European cohorts, followed by declining accuracy with increased genetic  
 406 divergence from Europe. A) Proportion of variance explained in each of the original  
 407 studies. B) Relative proportion of variance explained in each population with respect to  
 408 an independent European target population in each study. The diminished proportion of  
 409 variance explained in East Asian and African American populations relative to  
 410 Europeans is remarkably consistent despite differing genetic architectures, prediction  
 411 methods, and accuracy metrics due to similar population histories within these cohorts.  
 412 BMI = body mass index, EA = educational attainment, and SCZ = schizophrenia.  
 413

414

415

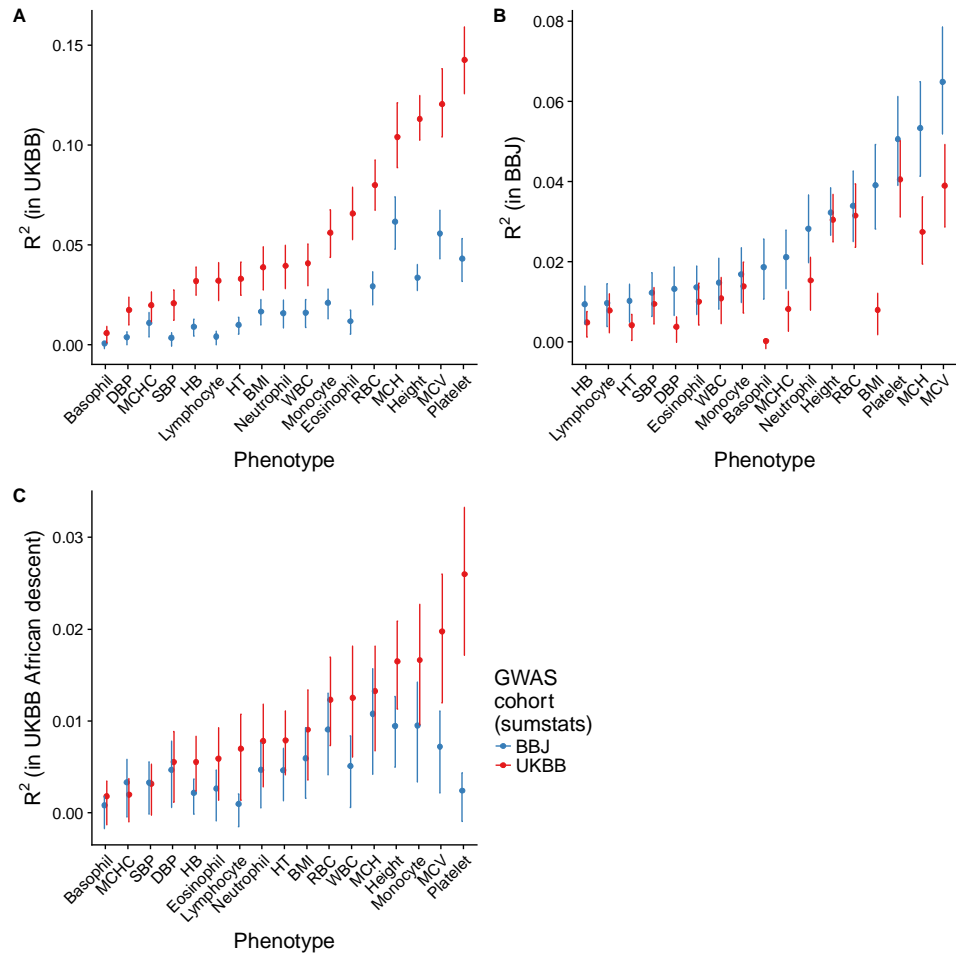

416

417

418 **Figure 4 – Polygenic risk prediction accuracy in Japanese, British, and African**

419 **descent individuals using independent GWAS of equal sample sizes in the**

420 **BioBank Japan and UK Biobank.** All target prediction cohorts are withheld from the

421 GWAS and thus independent. Sample sizes in each GWAS are identical between BBJ

422 and UKBB (**Table S1**). To optimize signal to noise, each point shows the maximum  $R^2$

423 (i.e. best predictor) across 10 p-value thresholds.  $R^2$  values for all p-value thresholds

424 are shown in **Figures S2-S4**. Prediction accuracy tends to be higher in the UK Biobank,

425 likely because observed heritability tends to be higher than in the BioBank Japan (**Table**

426 **S3**). A) Genetic prediction accuracy for 17 anthropometric and blood panel traits in

427 Japanese individuals using summary statistics from GWAS of independent BioBank  
428 Japan versus UK Biobank samples. B) Genetic prediction accuracy for the same 17  
429 anthropometric and blood panel traits in independent British individuals using summary  
430 statistics from GWAS of independent BioBank Japan versus the UK Biobank samples.  
431 C) Genetic prediction accuracy for 17 anthropometric and blood panel traits in African  
432 descent individuals in the UK Biobank using summary statistics from GWAS of  
433 independent BioBank Japan versus UK Biobank samples.

## 434 References

- 435 1. Knowles, J. W. & Ashley, E. A. Cardiovascular disease: The rise of the genetic  
436 risk score. *PLoS Med* **15**, e1002546–7 (2018).
- 437 2. Khera, A. V. *et al.* Genome-wide polygenic score to identify a monogenic risk-  
438 equivalent for coronary disease. (2017). doi:10.1101/218388
- 439 3. Kullo, I. J. *et al.* Incorporating a Genetic Risk Score Into Coronary Heart Disease  
440 Risk Estimates: Effect on Low-Density Lipoprotein Cholesterol Levels (the MI-  
441 GENES Clinical Trial). *Circulation* **133**, 1181–1188 (2016).
- 442 4. Paquette, M. *et al.* Polygenic risk score predicts prevalence of cardiovascular  
443 disease in patients with familial hypercholesterolemia. *Journal of Clinical*  
444 *Lipidology* **11**, 725–732.e5 (2017).
- 445 5. Natarajan, P. *et al.* Polygenic Risk Score Identifies Subgroup With Higher Burden  
446 of Atherosclerosis and Greater Relative Benefit From Statin Therapy in the  
447 Primary Prevention Setting Clinical Perspective. *Circulation* **135**, 2091–2101  
448 (2017).
- 449 6. Tikkanen, E., Havulinna, A. S., Palotie, A., Salomaa, V. & Ripatti, S. Genetic risk  
450 prediction and a 2-stage risk screening strategy for coronary heart disease.  
451 *Arterioscler. Thromb. Vasc. Biol.* **33**, 2261–2266 (2013).
- 452 7. Khera, A. V. *et al.* Genetic Risk, Adherence to a Healthy Lifestyle, and Coronary  
453 Disease. *N Engl J Med* **375**, 2349–2358 (2016).
- 454 8. Khera, A. V. & Kathiresan, S. Genetics of coronary artery disease: discovery,  
455 biology and clinical translation. *Nat Rev Genet* **18**, 331–344 (2017).
- 456 9. Martin, A. R. *et al.* Human Demographic History Impacts Genetic Risk Prediction  
457 across Diverse Populations. *Am. J. Hum. Genet.* **100**, 635–649 (2017).
- 458 10. Scutari, M., Mackay, I. & Balding, D. Using Genetic Distance to Infer the Accuracy  
459 of Genomic Prediction. *PLoS Genet* **12**, e1006288 (2016).
- 460 11. Vilhjálmsson, B. J. *et al.* Modeling Linkage Disequilibrium Increases Accuracy of  
461 Polygenic Risk Scores. *The American Journal of Human Genetics* **97**, 576–592  
462 (2015).
- 463 12. Ware, E. B. *et al.* Heterogeneity in polygenic scores for common human traits. 1–  
464 13 (2017). doi:10.1101/106062
- 465 13. Curtis, D. Polygenic risk score for schizophrenia is more strongly associated with  
466 ancestry than with schizophrenia. *bioRxiv* (2018).  
467 doi:<https://doi.org/10.1101/287136>
- 468 14. Ripke, S. *et al.* Biological insights from 108 schizophrenia-associated genetic loci.  
469 *Nature* **511**, 421–427 (2014).
- 470 15. Belsky, D. W. *et al.* Development and Evaluation of a Genetic Risk Score for  
471 Obesity. *Biodemography and Social Biology* **59**, 85–100 (2013).
- 472 16. Domingue, B. W., Belsky, D. W., Conley, D., Harris, K. M. & Boardman, J. D.  
473 Polygenic Influence on Educational Attainment. *AERA Open* **1**,  
474 233285841559997–13 (2015).
- 475 17. Wedow, R. *et al.* Gene discovery and polygenic prediction from a genome-wide  
476 association study of educational attainment in 1.1 million individuals. *Nat Genet*  
477 **92**, 109 (2018).

- 478 18. Vassos, E. *et al.* An Examination of Polygenic Score Risk Prediction in Individuals  
479 With First-Episode Psychosis. *Biological Psychiatry* **81**, 470–477 (2017).
- 480 19. Akiyama, M. *et al.* Genome-wide association study identifies 112 new loci for  
481 body mass index in the Japanese population. *Nat Genet* **49**, 1458–1467 (2017).
- 482 20. Li, Z. *et al.* Genome-wide association analysis identifies 30 new susceptibility loci  
483 for schizophrenia. *Nature Publishing Group* **49**, 1576–1583 (2017).
- 484 21. Need, A. C. & Goldstein, D. B. Next generation disparities in human genomics:  
485 concerns and remedies. *Trends in Genetics* **25**, 489–494 (2009).
- 486 22. Popejoy, A. B. & Fullerton, S. M. Genomics is failing on diversity. *Nature* **538**,  
487 161–164 (2016).
- 488 23. Morales, J. *et al.* A standardized framework for representation of ancestry data in  
489 genomics studies, with application to the NHGRI-EBI GWAS Catalog. 1–10  
490 (2018). doi:10.1186/s13059-018-1396-2
- 491 24. Rosenberg, N. A. *et al.* Genome-wide association studies in diverse populations.  
492 *Nat Rev Genet* **11**, 356–366 (2010).
- 493 25. Sham, P. C., Cherny, S. S., Purcell, S. & Hewitt, J. K. Power of linkage versus  
494 association analysis of quantitative traits, by use of variance-components models,  
495 for sibship data. *The American Journal of Human Genetics* **66**, 1616–1630  
496 (2000).
- 497 26. 1000 Genomes Project Consortium *et al.* A global reference for human genetic  
498 variation. *Nature* **526**, 68–74 (2015).
- 499 27. Consortium, T. S. 2. D. Sequence variants in SLC16A11 are a common risk factor  
500 for type 2 diabetes in Mexico. *Nature* **506**, 97–101 (2014).
- 501 28. Estrada, K. *et al.* Association of a Low-Frequency Variant in HNF1A With Type 2  
502 Diabetes in a Latino Population. *JAMA* **311**, 2305–2314 (2014).
- 503 29. Haiman, C. A. *et al.* Genome-wide association study of prostate cancer in men of  
504 African ancestry identifies a susceptibility locus at 17q21. *Nat Genet* **43**, 570–573  
505 (2011).
- 506 30. Genovese, G. *et al.* Association of trypanolytic ApoL1 variants with kidney  
507 disease in African Americans. *Science* **329**, 841–845 (2010).
- 508 31. Liu, J. Z. *et al.* Association analyses identify 38 susceptibility loci for inflammatory  
509 bowel disease and highlight shared genetic risk across populations. *Nat Genet*  
510 **47**, 979–986 (2015).
- 511 32. Carlson, C. S. *et al.* Generalization and Dilution of Association Results from  
512 European GWAS in Populations of Non-European Ancestry: The PAGE Study.  
513 *PLoS Biol* **11**, e1001661 (2013).
- 514 33. Easton, D. F. *et al.* Genome-wide association study identifies novel breast cancer  
515 susceptibility loci. *Nature* **447**, 1087–1093 (2007).
- 516 34. Mahajan, A. *et al.* Genome-wide trans-ancestry meta-analysis provides insight  
517 into the genetic architecture of type 2 diabetes susceptibility. *Nat Genet* **46**, 234–  
518 244 (2014).
- 519 35. Waters, K. M. *et al.* Consistent Association of Type 2 Diabetes Risk Variants  
520 Found in Europeans in Diverse Racial and Ethnic Groups. *PLoS Genet* **6**,  
521 e1001078 (2010).
- 522 36. Huang, H. *et al.* Fine-mapping inflammatory bowel disease loci to single-variant  
523 resolution. *Nature* **547**, 173–178 (2017).



- 524 37. Berg, J. J. *et al.* Reduced signal for polygenic adaptation of height in UK Biobank.  
525 1–44 (2018). doi:10.1101/354951
- 526 38. Sohail, M. *et al.* Signals of polygenic adaptation on height have been  
527 overestimated due to uncorrected population structure in genome-wide  
528 association studies. 1–44 (2018). doi:10.1101/355057
- 529 39. Duncan, L. *et al.* Analysis of Polygenic Score Usage and Performance across  
530 Diverse Human Populations. (2018). doi:10.1101/398396
- 531 40. Novembre, J. & Barton, N. H. Tread Lightly Interpreting Polygenic Tests of  
532 Selection. *Genetics* **208**, 1351–1355 (2018).
- 533 41. Henn, B. M., Botigué, L. R., Bustamante, C. D., Clark, A. G. & Gravel, S.  
534 Estimating the mutation load in human genomes. *Nat Rev Genet* **16**, 333–343  
535 (2015).
- 536 42. Zhu, Z. *et al.* Dominance Genetic Variation Contributes Little to the Missing  
537 Heritability for Human Complex Traits. *The American Journal of Human Genetics*  
538 **96**, 377–385 (2015).
- 539 43. Paré, G., Mao, S. & Deng, W. Q. A machine-learning heuristic to improve gene  
540 score prediction of polygenic traits. *Sci Rep* **7**, 12665 (2017).
- 541 44. Martin, A. R. *et al.* An Unexpectedly Complex Architecture for Skin Pigmentation  
542 in Africans. (2017). doi:10.1101/200139
- 543 45. Hindorff, L. A. *et al.* Prioritizing diversity in human genomics research. *Nature*  
544 *Publishing Group* 1–11 (2017). doi:10.1038/nrg.2017.89
- 545 46. H3Africa Consortium *et al.* Research capacity. Enabling the genomic revolution in  
546 Africa. *Science* **344**, 1346–1348 (2014).
- 547 47. Duncan, L. E. *et al.* Largest GWAS of PTSD (N=20,070) yields genetic overlap  
548 with schizophrenia and sex differences in heritability. *Molecular Psychiatry* (2017).  
549 doi:10.1038/mp.2017.77
- 550 48. Howrigan, D. Details and Considerations of the Uk Biobank GWAS.  
551 [http://www.nealelab.is/blog/2017/9/11/details-and-considerations-of-the-uk-](http://www.nealelab.is/blog/2017/9/11/details-and-considerations-of-the-uk-biobank-gwas)  
552 [biobank-gwas](http://www.nealelab.is/blog/2017/9/11/details-and-considerations-of-the-uk-biobank-gwas) (2017). Available at: (Accessed: 9 November 2017)
- 553 49. Kanai, M. *et al.* Genetic analysis of quantitative traits in the Japanese population  
554 links cell types to complex human diseases. *Nat Genet* 1–16 (2018).  
555 doi:10.1038/s41588-018-0047-6
- 556 50. Wray, N. R. *et al.* Pitfalls of predicting complex traits from SNPs. *Nature*  
557 *Publishing Group* **14**, 507–515 (2013).
- 558 51. Wray, N. R. *et al.* Research Review: Polygenic methods and their application to  
559 psychiatric traits. *J Child Psychol Psychiatr* **55**, 1068–1087 (2014).
- 560 52. Torkamani, A., Wineinger, N. E. & Topol, E. J. The personal and clinical utility of  
561 polygenic risk scores. *Nat Rev Genet* 1–10 (2018). doi:10.1038/s41576-018-  
562 0018-x
- 563 53. Manrai, A. K., Patel, C. J. & Ioannidis, J. P. A. In the Era of Precision Medicine  
564 and Big Data, Who Is Normal? *JAMA* **319**, 1981–1982 (2018).
- 565 54. Plenge, R. M., Scolnick, E. M. & Altshuler, D. Validating therapeutic targets  
566 through human genetics. *Nature Publishing Group* **12**, 581–594 (2013).
- 567 55. Carroll, M. D., Kit, B. K., Lacher, D. A., Shero, S. T. & Mussolino, M. E. Trends in  
568 lipids and lipoproteins in US adults, 1988–2010. *JAMA* **308**, 1545–1554 (2012).

- 569 56. Rappoport, N. *et al.* Creating ethnicity-specific reference intervals for lab tests  
570 from EHR data. *bioRxiv* (2017). doi:10.1101/213892
- 571 57. Lim, E., Miyamura, J. & Chen, J. J. Racial/Ethnic-Specific Reference Intervals for  
572 Common Laboratory Tests: A Comparison among Asians, Blacks, Hispanics, and  
573 White. *Hawaii J Med Public Health* **74**, 302–310 (2015).
- 574 58. Hero, J. O., Zaslavsky, A. M. & Blendon, R. J. The United States Leads Other  
575 Nations In Differences By Income In Perceptions Of Health And Health Care.  
576 *Health Aff* **36**, 1032–1040 (2017).  
577
