1 **Hidden ‘risk’ in polygenic scores: clinical use today could exacerbate health**  
2 **disparities**

3

4 Alicia R. Martin<sup>1,2,3</sup>, Masahiro Kanai<sup>1,2,3,4,5</sup>, Yoichiro Kamatani<sup>5,6</sup>, Yukinori Okada<sup>5,7,8</sup>,  
5 Benjamin M. Neale<sup>1,2,3</sup>, Mark J. Daly<sup>1,2,3,9</sup>

6

7 <sup>1</sup> Analytic and Translational Genetics Unit, Massachusetts General Hospital, Boston,  
8 MA 02114, USA

9 <sup>2</sup> Program in Medical and Population Genetics, Broad Institute of Harvard and MIT,  
10 Cambridge, MA 02142, USA

11 <sup>3</sup> Stanley Center for Psychiatric Research, Broad Institute of Harvard and MIT,  
12 Cambridge, MA 02142, USA

13 <sup>4</sup> Department of Biomedical Informatics, Harvard Medical School, Boston, MA 02115,  
14 USA

15 <sup>5</sup> Laboratory for Statistical Analysis, RIKEN Center for Integrative Medical Sciences,  
16 Yokohama 230-0045, Japan

17 <sup>6</sup> Kyoto-McGill International Collaborative School in Genomic Medicine, Graduate  
18 School of Medicine, Kyoto University, Kyoto 606-8507, Japan

19 <sup>7</sup> Department of Statistical Genetics, Osaka University Graduate School of Medicine,  
20 Suita 565-0871, Japan

21 <sup>8</sup> Laboratory of Statistical Immunology, Immunology Frontier Research Center (WPI-  
22 IFRc), Osaka University, Suita 565-0871, Japan

23 <sup>9</sup> Institute for Molecular Medicine Finland (FIMM), University of Helsinki, Helsinki,  
24 Finland

25

26 **Abstract**

27

28 Polygenic risk scores have the potential to improve health outcomes for a variety of  
29 complex diseases and are poised for clinical translation, driven by the low cost of  
30 genotyping (<\$50 per person), the ability to predict genetic risk of many diseases with a  
31 single test, and the dramatically increasing scale and power of genetic studies that aid  
32 prediction accuracy. However, the major *ethical* and *scientific* challenge surrounding  
33 clinical implementation is the observation that they are currently of far greater predictive  
34 value in European ancestry individuals than others. The better performance of such risk  
35 scores in European populations is an inescapable consequence of the heavily biased  
36 makeup of genome-wide association studies, with an estimated 79% of participants in  
37 all these existing studies being of European descent. Empirically, polygenic risk scores  
38 perform far better in European populations, with prediction accuracy reduced by  
39 approximately 2- to 5-fold in East Asian and African descent populations, respectively.  
40 This highlights that—unlike specific clinical biomarkers and prescription drugs, which  
41 may individually work better in some populations but do not ubiquitously perform far  
42 better in European populations—clinical uses of prediction today would systematically  
43 afford greater improvement to European descent populations. Early diversifying efforts,  
44 however, show promise in levelling this vast imbalance, even when non-European  
45 sample sizes are considerably smaller than the best-powered studies to date. Polygenic

46 risk scores provide a new opportunity to improve health outcomes for many diseases in  
47 all populations, but to realize this full potential equitably, we must prioritize greater  
48 inclusivity of diverse participants in genetic studies and open access to resulting  
49 summary statistics to ensure that health disparities are not increased for those already  
50 most underserved.

51

52 **Keywords:** health disparities, genetic risk prediction, polygenic risk scores, diversity,  
53 population genetics, statistical genetics

54

55 Polygenic risk scores (PRS), which predict complex traits using genetic data, are of  
56 burgeoning interest to the clinical community as researchers demonstrate their growing  
57 power to improve clinical care, genetic studies of a wide range of phenotypes increase  
58 in size and power, and genotyping costs plummet to less than US\$50. Many earlier  
59 criticisms of limited prediction power are now recognized to have been chiefly an issue  
60 of insufficient sample size, which is no longer the case for many outcomes <sup>1</sup>. For  
61 example, polygenic risk scores alone already predict breast and prostate cancer risk in  
62 European descent patients more accurately than current clinical models <sup>2-4</sup>. Additionally,  
63 integrated models of PRS together with other lifestyle and clinical factors have enabled  
64 clinicians to more accurately quantify the risk of heart attack for patients; consequently,  
65 they have more effectively targeted the reduction of LDL cholesterol and by extension  
66 heart attack by prescribing statins to patients at the greatest overall risk of  
67 cardiovascular disease <sup>5-9</sup>. Promisingly, return of genetic risk of complex disease to at-  
68 risk patients does not induce significant self-reported negative behavior or psychological

69 function, and some potentially positive behavioral changes have been detected <sup>10</sup>. While  
70 we share enthusiasm about the potential of PRS to improve health outcomes through  
71 their eventual routine implementation as clinical biomarkers, we consider the consistent  
72 observation that they are currently of far greater predictive value in individuals of recent  
73 European descent than in others to be the major *ethical* and *scientific* challenge  
74 surrounding clinical translation and, at present, the most critical limitation to genetics in  
75 precision medicine. The scientific basis of this imbalance has been demonstrated in  
76 population genetics simulations, theoretically, and empirically across many traits and  
77 diseases <sup>11-22</sup>.

78  
79 All studies to date using well-powered genome-wide association studies (GWAS) to  
80 assess the predictive value of PRS in European and non-European descent populations  
81 have made a consistent observation: PRS predict individual risk far more accurately in  
82 Europeans than non-Europeans. In complex traits including height, body mass index  
83 (BMI), educational attainment, schizophrenia, and major depression, existing PRS  
84 computed with the largest available GWAS results predict outcomes far more accurately  
85 in new samples of European-descent than they do in non-Europeans, with the clearest  
86 study examples in East Asians and African Americans <sup>15,16,18-24</sup>. Rather than chance or  
87 biology, this is a predictable consequence of the fact that the genetic discovery efforts to  
88 date heavily underrepresent non-European populations globally. The correlation  
89 between true and genetically predicted phenotypes decays with genetic divergence  
90 from the makeup of the discovery GWAS, meaning that the accuracy of polygenic  
91 scores in different populations is highly dependent on the study population

92 representation in the largest existing ‘training’ GWAS. Here, we document study biases  
93 that underrepresent non-European populations in current GWAS, and explain the  
94 fundamental concepts contributing to reduced phenotypic variance explained with  
95 increasing genetic divergence from populations included in GWAS.

96

### 97 **Predictable basis of disparities in polygenic risk score accuracy**

98 Poor generalizability of genetic studies across populations arises from the  
99 overwhelming abundance of European descent studies and dearth of well-powered  
100 studies in globally diverse populations<sup>25-28</sup>. According to the GWAS catalog, ~79% of all  
101 GWAS participants are of European descent despite making up only 16% of the global  
102 population (**Figure 1**). This is especially problematic as previous studies have shown  
103 that Hispanic/Latino and African American studies have contributed an outsized number  
104 of associations relative to studies of similar sizes in Europeans<sup>27</sup>. More concerning,  
105 the fraction of non-European individuals in GWAS has stagnated or declined since late  
106 2014 (**Figure 1**), suggesting that we are not on a trajectory to correct this imbalance.  
107 These numbers provide a composite metric of study availability, accessibility, and use—  
108 i.e., cohorts that have been included in numerous GWAS are represented multiple  
109 times, which may disproportionately include cohorts of European descent. Whereas the  
110 average sample sizes of GWAS in Europeans continue to grow though, they have  
111 stagnated and remain several-fold smaller in other populations (**Figure S1**).

112

113 The relative sample compositions of GWAS result in highly predictable disparities in  
114 prediction accuracy; statistical and population genetics theory predicts that genetic risk

115 prediction accuracy will decay with increasing genetic divergence between the original  
116 GWAS sample and target of prediction, a function of population history<sup>13,14</sup>. This pattern  
117 can be attributed to several statistical observations which we detail below: 1) GWAS  
118 favor the discovery of genetic variants that are common in the study population; 2)  
119 linkage disequilibrium (LD) differentiates marginal effect size estimates for highly  
120 polygenic traits across populations, even when causal variants are the same; and 3)  
121 environment and demography differ across populations, which may interact to drive  
122 differential forces of natural selection that in turn drive differences in causal genetic  
123 architecture\*. Of note, the first two of these degrade prediction performance across  
124 populations substantially even when there exist no biological, environmental, or  
125 diagnostic differences.

126

### 127 *Common discoveries and low-hanging fruit*

128 First, the power to discover an association in a genetic study depends on the effect size  
129 and frequency of the variant<sup>29</sup>. This power dependence means that the most significant  
130 associations tend to be more common in the populations in which they are discovered  
131 than in other populations<sup>13,30</sup>. For example, GWAS catalog variants are on average  
132 more common in European populations compared to East Asian and African  
133 populations (**Figure 2B**), an observation not representative of genomic variants at large.  
134 Understudied populations offer low-hanging fruit for genetic discovery because variants  
135 that are common in these groups but rare or absent in European populations could not

---

\* We define the causal genetic architecture as the true effects (typically written as  $\beta$  in the GWAS literature) of variants that impact a phenotype that would be identified in a population of infinite sample size. Unlike effect size estimates (usually written as  $\hat{\beta}$ ), true effects are typically modeled as invariant with respect to LD and allele frequency differences across populations.

136 be discovered even with very large European sample sizes. Some examples include  
137 *SLC16A11* and *HNF1A* associations with type II diabetes in Latino populations, *APOL1*  
138 associations with end-stage kidney disease, and associations with prostate cancer in  
139 African descent populations<sup>31-34</sup>. If we assume that causal genetic variants have an  
140 equal effect across all populations—an assumption with some empirical support that  
141 offers the best case scenario for transferability<sup>35-40</sup>—Eurocentric GWAS biases mean  
142 that variants that are common in European populations are preferentially discovered  
143 and associated with risk, and thus account for a larger fraction of the variance in  
144 polygenic risk<sup>13</sup>. Furthermore, imputation reference panels share the same study  
145 biases as in GWAS<sup>41</sup>, creating challenges for imputing sites that are rare in European  
146 populations but common elsewhere when the catalog of non-European haplotypes is  
147 substantially smaller. These issues are insurmountable through statistical methods  
148 alone<sup>13</sup>, but rather motivate substantial investments in more diverse populations to  
149 produce similar-sized GWAS of biomedical phenotypes as well as sequenced reference  
150 panels in other populations.

151

### 152 *Linkage disequilibrium*

153 Second, the correlation structure of the human genome, i.e. LD, varies across  
154 populations due to demographic history (**Figure 2A,C-E**). These LD differences in turn  
155 drive differences in effect size estimates (i.e. predictors) from GWAS across  
156 populations, even when causal effects are the same. (Mathematically, the marginal  
157 GWAS estimate  $\hat{\beta}_j = \sum_{k=1}^m r_{j,k} \beta_k + \epsilon_j$ , where  $\hat{\beta}_j$  are effect size estimates at SNP  $j$ ,  $r_{j,k}$  is  
158 pairwise SNP LD between SNPs  $j$  and  $k$ ,  $\beta_k$  is the causal SNP effect at nearby SNP  $k$ ,

159 and  $\epsilon$  is residual error from bias or noise. More simply, when causal effects are the same  
160 across populations, effect size *estimates* at SNPs tagging these causal variants from which we  
161 construct predictors will differ across populations in proportion to LD between tagging and  
162 causal SNP pairs.) While differences in effect size estimates due to LD differences may  
163 typically be small for most regions of the genome (**Figure 2C-E**), PRS sum across these  
164 effects, also aggregating these population differences. Statistical methods that account  
165 for LD differences across populations may help improve risk prediction accuracy within  
166 each population. While empirical studies suggest that causal effect sizes tend to be  
167 shared<sup>35-40</sup>, it may not be feasible to fine-map most variants to a single locus to solve  
168 issues of low generalizability (i.e. using causal rather than correlated effect size  
169 estimates), even with very large GWAS. This is because complex traits are highly  
170 polygenic, meaning most of our prediction power comes from small effects that do not  
171 meet genome-wide significance and/or cannot be fine-mapped, even in many of the  
172 best-powered GWAS to date<sup>42</sup>.

173

#### 174 *History, selection, the environment, and complex interactions*

175 Lastly, other environmental, demographic, and cohort considerations may further  
176 worsen prediction accuracy differences across populations in less predictable ways.  
177 GWAS ancestry study biases and LD differences across populations are extremely  
178 challenging to address, but these issues actually make many favorable assumptions  
179 that all causal loci have the same impact and are under equivalent selective pressure in  
180 all populations. In contrast, other effects on polygenic adaptation or risk scores such as  
181 long-standing environmental differences across global populations that have resulted in  
182 differing responses of natural selection can impact populations differently based on their



183 unique histories. Additionally, residual uncorrected population stratification may impact  
184 risk prediction accuracy across populations, but the magnitude of its effect is currently  
185 unclear. These effects are particularly challenging to disentangle, as has clearly been  
186 demonstrated for height, where evidence of polygenic adaptation and/or its relative  
187 magnitude is under question<sup>43,44</sup>. Comparisons of geographically stratified phenotypes  
188 like height across populations with highly divergent genetic backgrounds and mean  
189 environmental differences, such as differences in resource abundance during  
190 development across continents, are especially prone to confounding from correlated  
191 environmental and genetic divergence<sup>43,44</sup>. This residual stratification can lead to over-  
192 predicted differences across geographical space<sup>45</sup>.

193  
194 Related to stratification, most polygenic scoring methods do not explicitly address  
195 recent admixture and none consider recently admixed individuals' unique local mosaic  
196 of ancestry—further methods development in this space is needed. Furthermore,  
197 comparing PRS across environmentally stratified cohorts, such as in some biobanks  
198 with healthy volunteer effects versus disease study datasets or hospital-based cohorts,  
199 requires careful consideration of technical differences, collider bias, as well as variability  
200 in baseline health status among studies. It is also important to consider differences in  
201 clinical definition of the phenotypes and heterogeneous constitution of sub-phenotypes  
202 among countries.

203  
204 Another consideration is the fact that, like other existing biomarkers, the predictive utility  
205 of PRS may change as a function of age, consistent with age-dependent heritability for

206 some traits<sup>46</sup>. For example, increasing age is associated with higher risk of coronary  
207 artery disease, and higher PRS accelerate this increased risk<sup>47</sup>. Consequently, the age  
208 of intervention e.g. with statins needs to be evaluated in aggregate with other clinical  
209 risk factors that change over time. Autism spectrum disorder and schizophrenia also  
210 have a genetic basis with differing developmental trajectories; their shared genetic  
211 influences decrease with age, whereas the genetic overlap between schizophrenia and  
212 social communication difficulties persists with age<sup>48</sup>. Further work on how prediction  
213 accuracy varies as a function of age across phenotypes is needed.

214

215 Differences in environmental exposure, gene × gene interactions, gene × environment  
216 interactions, historical population size dynamics, and other factors will further limit  
217 generalizability for genetic risk scores in an unpredictable, trait-specific fashion<sup>49,50</sup>.

218 Complex traits do not behave in a genetically deterministic manner, with some  
219 environmental factors dwarfing individual genetic effects, creating outsized issues of  
220 comparability across globally diverse populations; among psychiatric disorders for  
221 example, whereas schizophrenia has a nearly identical genetic basis across East  
222 Asians and Europeans ( $r_g=0.98$ )<sup>40</sup>, substantially different rates of alcohol use disorder  
223 across populations is partially explained by differences in availability and genetic  
224 differences impacting alcohol metabolism<sup>51</sup>. While non-linear genetic factors explain  
225 little variation in complex traits beyond a purely additive model<sup>52</sup>, some unrecognized  
226 nonlinearities and gene × gene interactions can also induce genetic risk prediction  
227 challenges, as pairwise interactions are likely to vary more across populations than  
228 individual SNPs. Mathematically, we can simplistically think of this in terms of a two-

229 SNP model, in which the sum of two SNP effects is likely to explain more phenotypic  
230 variance than the product of the same SNPs. Some machine learning approaches may  
231 thus modestly improve genetic prediction accuracy beyond current approaches for  
232 some phenotypes<sup>53</sup>, but these approaches are most likely to improve prediction  
233 accuracy for atypical traits with simpler architectures, known interactions, and poor  
234 prediction generalizability across populations, such as skin pigmentation<sup>54</sup>.

235

### 236 **Limited generalizability of genetic prediction across diverse populations**

237 Previous work has assessed prediction accuracy across diverse populations in several  
238 traits and diseases for which GWAS summary statistics are available. These  
239 assessments are becoming increasingly feasible with the growth and public availability  
240 of global biobanks for quantitative traits as well as diversifying priorities from funding  
241 agencies<sup>55,56</sup>. As of yet, multi-ethnic work has been slow in most disease areas<sup>57</sup>,  
242 limiting even the opportunity to assess prediction utility in non-European cohorts.

243 Nonetheless, we have assembled prediction accuracy statistics from several studies  
244 using the largest European GWAS to predict several phenotypes in target European  
245 and non-European cohorts. For example, multiple schizophrenia studies consistently  
246 predicted risk on average 2.2-fold worse in East Asians relative to Europeans, (i.e.  
247  $\mu=0.46$ ,  $\sigma=0.06$ ), using summary statistics from a Eurocentric GWAS<sup>15,18</sup> (**Figure S2**),  
248 despite the fact that there is no significant genetic heterogeneity in schizophrenia  
249 between the two populations<sup>40</sup>. This finding is even more pronounced in African  
250 Americans, consistent with higher genetic divergence from Europeans than between  
251 Europeans and East Asians<sup>30</sup>. Across several phenotypes with a range of genetic

252 architectures in which empirical evaluations were available, including BMI, educational  
253 attainment, height, and schizophrenia, prediction accuracy using European GWAS  
254 summary statistics was on average 4.5-fold less accurate in African Americans than in  
255 Europeans (i.e.  $\mu=0.22$ ,  $\sigma=0.09$ , **Figure S2**)<sup>15,16,19-22</sup>. By extension, prediction accuracy  
256 is expected to be even lower in African Americans with higher than average African  
257 ancestry or among populations with greater divergence from Europeans (e.g. some  
258 southern African populations). These enormous disparities are not simply  
259 methodological issues, as various approaches (e.g. pruning and threshold versus  
260 LDpred) and accuracy metrics ( $R^2$  for quantitative traits and various pseudo- $R^2$  metrics  
261 for binary traits) illustrate this consistently poorer performance in populations distinct  
262 from the discovery sample across a range of polygenic traits (**Table S4**). We assessed  
263 how prediction accuracy decayed across globally diverse populations for 17  
264 anthropometric and blood panel traits in the UK Biobank (UKBB) when using European-  
265 derived summary statistics (**Methods**); consistent with previous studies, we find that  
266 relative to European prediction accuracy, genetic prediction accuracy was far lower in  
267 other populations (**Figure 3**, notably 1.6-fold lower in Hispanic/Latino Americans, 1.7-  
268 fold lower in South Asians, 2.5-fold lower in East Asians, and 4.9-fold lower in Africans  
269 on average).

270

### 271 **Prioritizing diversity shows early promise for polygenic prediction**

272 Early diversifying GWAS efforts have been especially productive for informing on these  
273 questions surrounding risk prediction. Rather than varying the prediction target dataset,  
274 some GWAS in diverse populations have increased the scale of non-European

275 summary statistics and also varied the study dataset in multi-ethnic PRS studies. For  
276 example, a BioBank Japan (BBJ) GWAS study (N=158,284) showed that compared to a  
277 2× larger European GWAS (N=322,154), the variance in BMI explained in an  
278 independent Japanese cohort with Japanese GWAS summary statistics was on  
279 average 1.5-fold greater than with European GWAS summary statistics ( $R^2=0.154$  vs  
280  $0.104$  at  $p < 0.05$ , respectively)<sup>23</sup>. Relatedly, an East Asian schizophrenia study  
281 (N=22,778 cases and 35,362 controls) showed that compared to an effectively 3× larger  
282 European study, prediction accuracy in East Asians was on average 1.3-fold higher  
283 than with European summary statistics (liability  $R^2=0.029$  vs  $0.022$ , respectively)<sup>40</sup>.  
284 Thus, even when studies in non-European populations are only a fraction the size of the  
285 largest European study, they are likely to have disproportionate value for predicting  
286 polygenic traits in other individuals of similar ancestry.

287  
288 Given this background, we performed a systematic evaluation of polygenic prediction  
289 accuracy across 17 quantitative anthropometric and blood panel traits and five disease  
290 endpoints in British and Japanese individuals<sup>23,58,59</sup> by performing GWAS with the exact  
291 same sample sizes in each population. We symmetrically demonstrate that prediction  
292 accuracy is consistently higher with GWAS summary statistics from ancestry-matched  
293 summary statistics (**Figure 4, Figure S8–12**). Keeping in mind issues of comparability  
294 described above, we note that BBJ is a hospital-based disease-ascertained cohort,  
295 whereas UKBB is a healthier than average population-based cohort; thus, differences in  
296 observed heritability among these cohorts (rather than among populations) due to  
297 differences in phenotype precision likely explain lower prediction accuracy from the BBJ

298 GWAS summary statistics for anthropometric and blood panel traits, but higher  
299 prediction accuracy for five ascertained diseases (**Table S5**). Indeed, other East Asian  
300 studies have estimated higher heritability for some quantitative traits than BBJ using the  
301 same methods, such as for height ( $h^2 = 0.48 \pm 0.04$  in Chinese women)<sup>60</sup>. Some  
302 statistical fluctuations in the relative differences in prediction accuracy across  
303 populations are likely driven by differences in heritability measured in each population  
304 and/or trans-ethnic genetic correlation<sup>†</sup> (**Figure S4-7, Table S5-8**). These correlation  
305 estimates indicate that effect sizes were mostly highly correlated across ancestries, with  
306 a few traits that were somewhat lower than expected (e.g. height and BMI, with  
307  $\rho_{ge} = 0.69$  and  $0.75$ , respectively); effect sizes can be different across populations due to  
308 natural selection differences, gene-gene interactions, gene-environment interactions,  
309 statistical noise, and/or other phenomena<sup>61</sup>. Prediction accuracy was far lower in  
310 individuals of African descent in the UK Biobank (**Figure S10 and S13**) using GWAS  
311 summary statistics from either European or Japanese ancestry individuals, consistent  
312 with reduced prediction accuracy with increasing genetic divergence (**Figures 3 and 4**).  
313 These population studies demonstrate the power and utility of increasingly diverse  
314 GWAS for prediction, especially in populations of non-European descent.

315  
316 While many other traits and diseases have been studied in multi-ethnic settings, few  
317 have reported comparable metrics of prediction accuracy across populations.

318 Cardiovascular research, for example, has led the charge towards clinical translation of  
319 PRS<sup>1</sup>. This enthusiasm is driven by observations that a polygenic burden of LDL-

---

<sup>†</sup> Trans-ethnic genetic correlation compares the estimated correlation of common variant effect sizes at SNPs common in two populations, here using Popcorn<sup>61</sup>.

320 increasing SNPs can confer monogenic-equivalent risk of cardiovascular disease, with  
321 polygenic scores improving clinical models for risk assessment and statin prescription  
322 that can reduce coronary heart disease and improve healthcare delivery efficiency<sup>5,6,8</sup>.  
323 However, many of these studies have been conducted exclusively in European descent  
324 populations, with few studies rigorously evaluating population-level applicability to non-  
325 Europeans. Those existing findings indeed demonstrate a large reduction in prediction  
326 utility in non-European populations<sup>11</sup>, though often with comparisons of odds ratios  
327 among arbitrary breakpoints in the risk distribution that make comparisons across  
328 studies challenging. To better clarify how polygenic prediction will be deployed in a  
329 clinical setting with diverse populations, more systematic and thorough evaluations of  
330 the utility of PRS within and across populations for many complex traits are still needed.  
331 These evaluations would benefit from rigorous polygenic prediction accuracy  
332 evaluations, especially for diverse non-European patients<sup>62-64</sup>.

333

### 334 **Translational genetic prediction may uniquely exacerbate disparities**

335 Our impetus for raising these statistical issues limiting the generalizability of PRS across  
336 population stems from our concern that, while they are legitimately clinically promising  
337 for improving health outcomes for many biomedical phenotypes, they may have a larger  
338 potential to raise health disparities than other clinical factors for several reasons. The  
339 opportunities they provide for improving health outcomes means they inevitably will and  
340 should be pursued in the near term, but we urge that a concerted prioritization to make  
341 GWAS summary statistics easily accessible for diverse populations and a variety of  
342 traits and diseases is imperative, even when they are a fraction the size of the largest

343 existing European datasets. *Individual* clinical tests, biomarkers, and prescription drug  
344 efficacy may vary across populations in their utility, but are fundamentally informed by  
345 the same underlying biology<sup>65,66</sup>. Currently, guidelines state that as few as 120  
346 individuals define reference intervals for clinical factors (though often smaller numbers  
347 from only one subpopulation are used) and there is no clear definition of who is “normal”  
348<sup>65</sup>. Consequently, reference intervals for biomarkers can sometimes deviate  
349 considerably by reported ethnicity<sup>67-69</sup>. Defining ethnicity-specific reference intervals is  
350 clearly an important problem that can provide fundamental interpretability gains with  
351 implications for some major health benefits (e.g. need for dialysis and development of  
352 Type 2 diabetes based on ethnicity-specific serum creatinine and hemoglobin A1C  
353 reference intervals, respectively)<sup>68</sup>. Simply put, some biomarkers or clinical tests scale  
354 directly with health outcomes independent of ancestry, and many others may have  
355 distributional differences by ancestry but are equally valid after centering with respect to  
356 a readily collected population reference.

357

358 In contrast, PRS are uniformly less useful in understudied populations due to  
359 differences in genomic variation and population history<sup>13,14</sup>. No analogous solution of  
360 defining ethnicity-specific reference intervals would ameliorate health disparities  
361 implications for PRS or fundamentally aid interpretability in non-European populations.  
362 Rather, as we and others demonstrate, PRS are unique in that even with multi-ethnic  
363 population references, these scores are fundamentally less informative in populations  
364 more diverged from GWAS study cohorts.

365



366 The clinical use and deployment of genetic risk scores needs to be informed by the  
367 issues surrounding tests that currently would unequivocally provide much greater  
368 benefit to the subset of the world's population which is already on the positive end of  
369 healthcare disparities<sup>‡</sup>. Conversely, African descent populations, which already endure  
370 many of the largest health disparities globally, are often predicted marginally better, if at  
371 all, compared to random (**Figure 4F**). They are therefore least likely to benefit from  
372 improvements in precision healthcare delivery from genetic risk scores with existing  
373 data due to human population history and study biases. This is a major concern globally  
374 and especially in the U.S., which already leads other middle- and high-income countries  
375 in both real and perceived healthcare disparities<sup>70</sup>. Thus, we would strongly urge that  
376 any discourse on clinical use of polygenic scores include a careful, quantitative  
377 assessment of the economic and health disparities impacts on underrepresented  
378 populations that might be unintentionally introduced by the use of PRS and raise  
379 awareness about how to eliminate these disparities.

380

### 381 **How do we even the ledger?**

382 What can be done? The single most important step towards parity in PRS accuracy in  
383 diverse populations is by vastly increasing the diversity of participants included and  
384 analyzed in genetic studies. Regulatory protections against genetic discrimination are  
385 necessary to accompany calls for more diverse studies; while some already exist in the  
386 U.S., including for health insurance and employment opportunities via the Genetic  
387 Information Nondiscrimination Act (GINA), stronger protections in these and other areas

---

<sup>‡</sup> To maximally benefit all populations, the largest existing GWAS results should be used. Downsampling European GWAS for the sake of parity results in worse predictors for all individuals.

388 globally will be particularly important for minorities and/or marginalized groups. An equal  
389 investment in GWAS across all major ancestries and global populations is the most  
390 obvious solution to generate a substrate for equally informative risk scores but is not  
391 likely to occur any time soon absent a dramatic priority shift given the current imbalance  
392 and stalled diversifying progress over the last five years (**Figure 1, Figure S1**). While it  
393 may be challenging or in some cases infeasible to acquire sample sizes large enough  
394 for PRS to be equally informative in all populations, some much-needed efforts towards  
395 increasing diversity in genomics that support open sharing of GWAS summary data  
396 from multiple ancestries are underway. Examples include the *All of Us* Research  
397 Program, the Population Architecture using Genomics and Epidemiology (PAGE)  
398 Consortium, as well as some disease-focused consortia, such as the T2D-genes and  
399 Stanley Global initiatives on the genetics of type II diabetes and psychiatric disorders,  
400 respectively<sup>§</sup>. Supporting data resources such as imputation panels, multi-ethnic  
401 genotyping arrays, gene expression datasets from genetically diverse individuals, and  
402 other tools are necessary to similarly empower these diverse studies to most effectively  
403 improve predictive accuracy for all populations. The lack of supporting resources for  
404 diverse ancestries creates financial challenges for association studies with limited  
405 resources, e.g. raising questions about whether to genotype samples on GWAS arrays  
406 that may favor European allele frequencies versus sequence samples, and how dense  
407 of an array to choose or how deeply to sequence<sup>71,72</sup>.

408

---

<sup>§</sup> For these diverse studies in the U.S. and globally, genetically determined ancestry and populations are important to delineate from self-identified race/ethnicity, as only controlling for the former can account for stratification of allele frequencies within a population.

409 Additional leading global efforts also provide easy unified access linking genetic, clinical  
410 record, and national registry data in more homogeneous continental ancestries, such as  
411 the UK Biobank, BioBank Japan, China Kadoorie Biobank, and Nordic efforts (e.g. in  
412 Danish, Estonian, Finnish, and other integrated biobanks). Notably, some of these  
413 biobanks such as UK Biobank have participants with considerable global genetic  
414 diversity that enables multi-ethnic comparisons; although minorities from this cohort  
415 provide the largest deeply phenotyped GWAS cohorts for several ancestries, these  
416 individuals are often excluded in current statistical analyses in favor of single ancestries,  
417 large sample sizes, and the simplicity afforded by genetic homogeneity. These  
418 considerations notwithstanding, there are critical needs and challenges for expanding  
419 the scale of genetic studies of heritable traits in diverse populations; this is especially  
420 apparent in Africa where humans originated and retain the most genetic diversity, as  
421 Africans are understudied but disproportionately informative for genetic analyses and  
422 evolutionary history<sup>27,73</sup>. The most notable investment here comes from the Human  
423 Heredity and Health in Africa (H3Africa) Initiative, increasing genomics research  
424 capacity in Africa through more than \$216 million in funding from the NIH (USA) and  
425 Wellcome Trust (UK) for genetics research led by African investigators<sup>56,74</sup>. The  
426 increasing interest and scale of genetic studies in low- and middle-income countries  
427 (LMICs) raises ethical and logistical considerations about data generation, access,  
428 sharing, security, and analysis, as well as clinical implementation to ensure these  
429 advances do not only benefit high-income countries. Frameworks such as the  
430 H3ABioNet, a pan-African bioinformatics network designed to build capacity to enable

431 H3Africa researchers to analyze their data in Africa, provide cost-effective examples for  
432 training local scientists in LMICs <sup>75</sup>.

433

434 The prerequisite data for dramatically increasing diversity also hypothetically exist in  
435 several large-scale publicly funded datasets such as the Million Veterans Project and  
436 Trans-Omics for Precision Medicine (TOPMed), but with problematic data access issues  
437 in which even summary data from GWAS within and across populations are not publicly  
438 shared. Existing GWAS consortia also need to carefully consider the granularity of  
439 summary statistics they release, as finer scale continental ancestries and phenotypes in  
440 large, multi-ethnic projects enable ancestry-matched analyses not possible with a single  
441 set of summary statistics. While there is an understandable patient privacy balance to  
442 strike when sharing individual-level data, GWAS summary statistics from all publicly  
443 funded and as many privately funded projects as possible should be made easily and  
444 publicly accessible to improve global health outcomes. Efforts to unify phenotype  
445 definitions, normalization approaches, and GWAS methods among studies will also  
446 improve comparability.

447

448 To enable progress towards parity, it will be critical that open data sharing standards be  
449 adopted for all ancestries and for genetic studies of all sample sizes, not just the largest  
450 European results. Locally appropriate and secure genetic data sharing techniques as  
451 well as equitable technology availability will need to be adopted widely in Asia and  
452 Africa as they are in Europe and North America, to ensure that maximum value is  
453 achieved from existing and ongoing efforts that are being developed to help counter the

454 current imbalance. Simultaneously, ethical considerations require that research capacity  
455 is increased in LMICs with simultaneous growth of diverse population studies to balance  
456 the benefits of these studies to scientists and patients globally versus locally to ensure  
457 that everyone benefits. Methodological improvements that better define risk scores by  
458 accounting for population allele frequency, LD, and/or admixture differences  
459 appropriately are underway and may help considerably but will not by themselves bring  
460 equality. All of these efforts are important and should be prioritized not just for risk  
461 prediction but more generally to maximize the use and applicability of genetics to inform  
462 on the biology of disease. Given the acute recent attention on clinical use of PRS, we  
463 believe it is paramount to recognize their potential to improve health outcomes for all  
464 individuals and many complex diseases. Simultaneously, we as a field must address the  
465 disparity in utility in an ethically thoughtful and scientifically rigorous fashion, lest we  
466 inadvertently enable genetic technologies to contribute to, rather than reduce, existing  
467 health disparities.

468

## 469 **Acknowledgments**

470 We thank Amit Khera for helpful discussions. We also thank Michiaki Kubo, Yoshinori  
471 Murakami, Masato Akiyama, and Kazuyoshi Ishigaki for their support in the BioBank  
472 Japan Project analysis. We are grateful to Steven Gazal for his help in calculating LD  
473 scores. This work was supported by funding from the National Institutes of Health  
474 (K99MH117229 to A.R.M.). UK Biobank analyses were conducted via application  
475 31063. The BioBank Japan Project was supported by the Tailor-Made Medical  
476 Treatment Program of the Ministry of Education, Culture, Sports, Science, and

477 Technology (MEXT) and the Japan Agency for Medical Research and Development  
478 (AMED). M.K. was supported by a Nakajima Foundation Fellowship and the Masason  
479 Foundation.

480

## 481 Figures

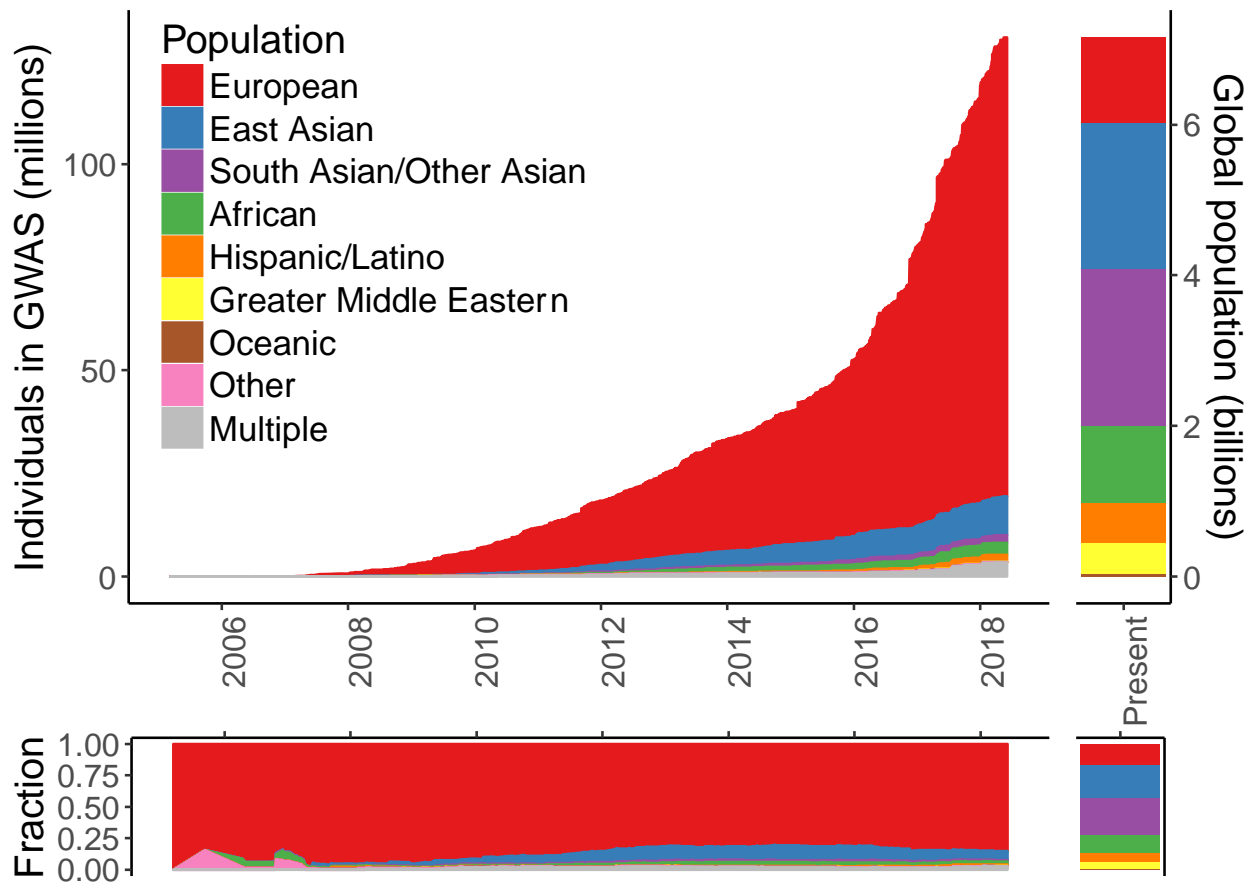

482

483 **Figure 1 – Ancestry of GWAS participants over time compared to the global**  
484 **population.** Cumulative data as reported by the GWAS catalog<sup>27</sup>. A notable caveat is  
485 that because some cohorts are included in numerous studies, some individuals are  
486 represented multiple times. This bias in multiple counting is especially likely for publicly  
487 available cohorts, which are more likely to be of European or East Asian descent.  
488 Individuals whose ancestry is “not reported” are not shown.

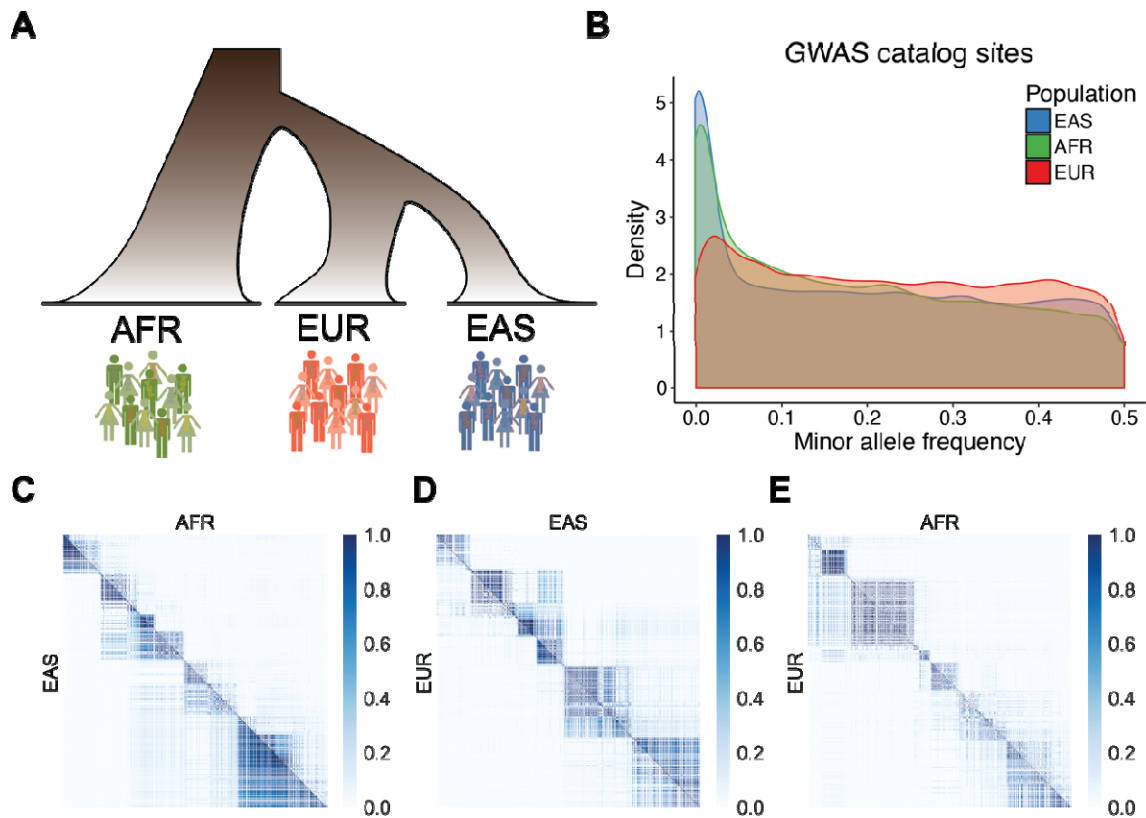

489

490 **Figure 2 – Demographic relationships, allele frequency differences, and local LD**

491 **patterns between population pairs.** Data analyzed from 1000 Genomes, in which

492 population labels are: AFR = continental African, EUR = European, and EAS = East

493 Asian. A) Cartoon relationships among AFR, EUR, and EAS populations. B) Allele

494 frequency distributions in AFR, EUR, and EAS populations of variants from the GWAS

495 catalog. C-E) Color axis shows LD scale ( $r^2$ ). LD comparisons between pairs of

496 populations show the same region of the genome for each comparison (representative

497 region is chr1, 51572kb-52857kb) among pairs of SNPs polymorphic in both

498 populations, illustrating that different SNPs are polymorphic across some population

499 pairs, and that these SNPs have variable LD patterns across populations.

500

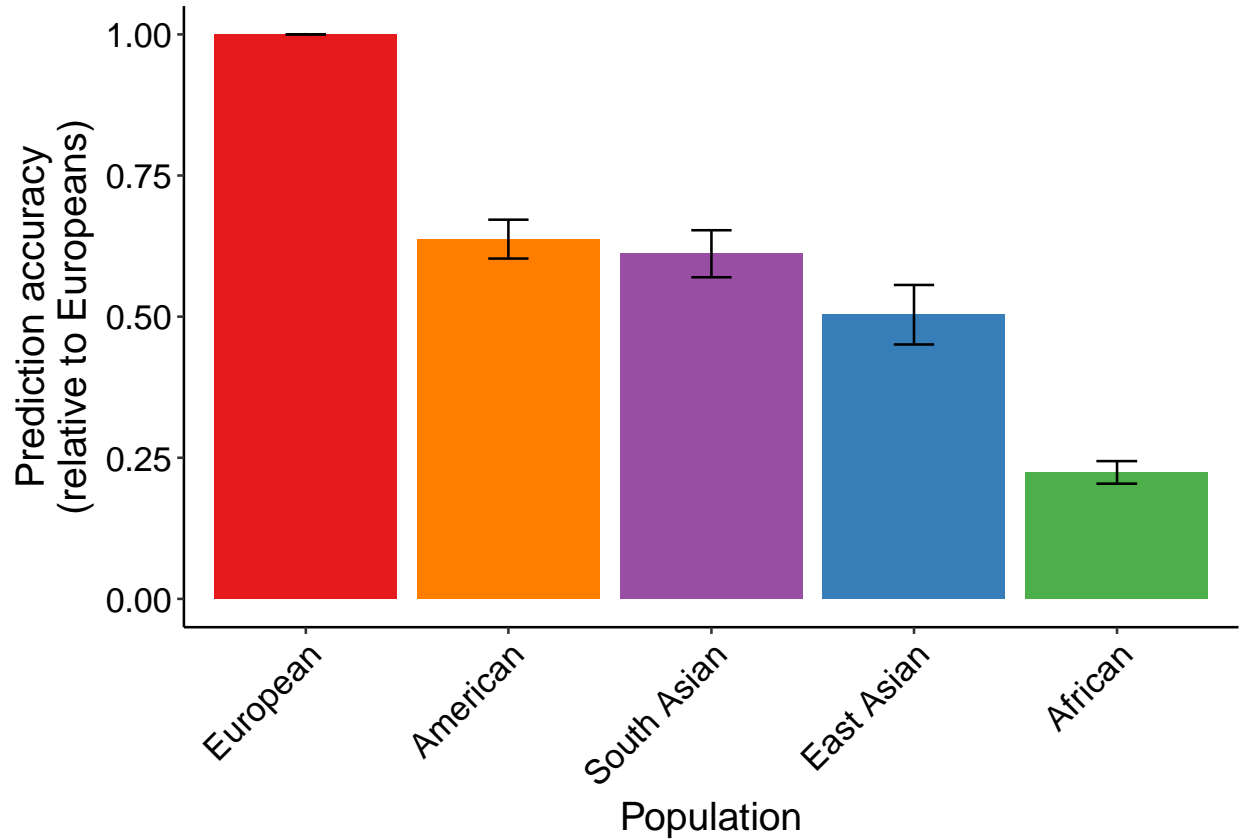

501

502 **Figure 3 – Prediction accuracy relative to European ancestry individuals across**  
503 **17 quantitative traits and 5 continental populations in UKBB.** All phenotypes shown  
504 here are quantitative anthropometric and blood panel traits, as described in **Table S1**,  
505 including sample sizes. Bars show mean values, and error bars show standard errors of  
506 the means.

507



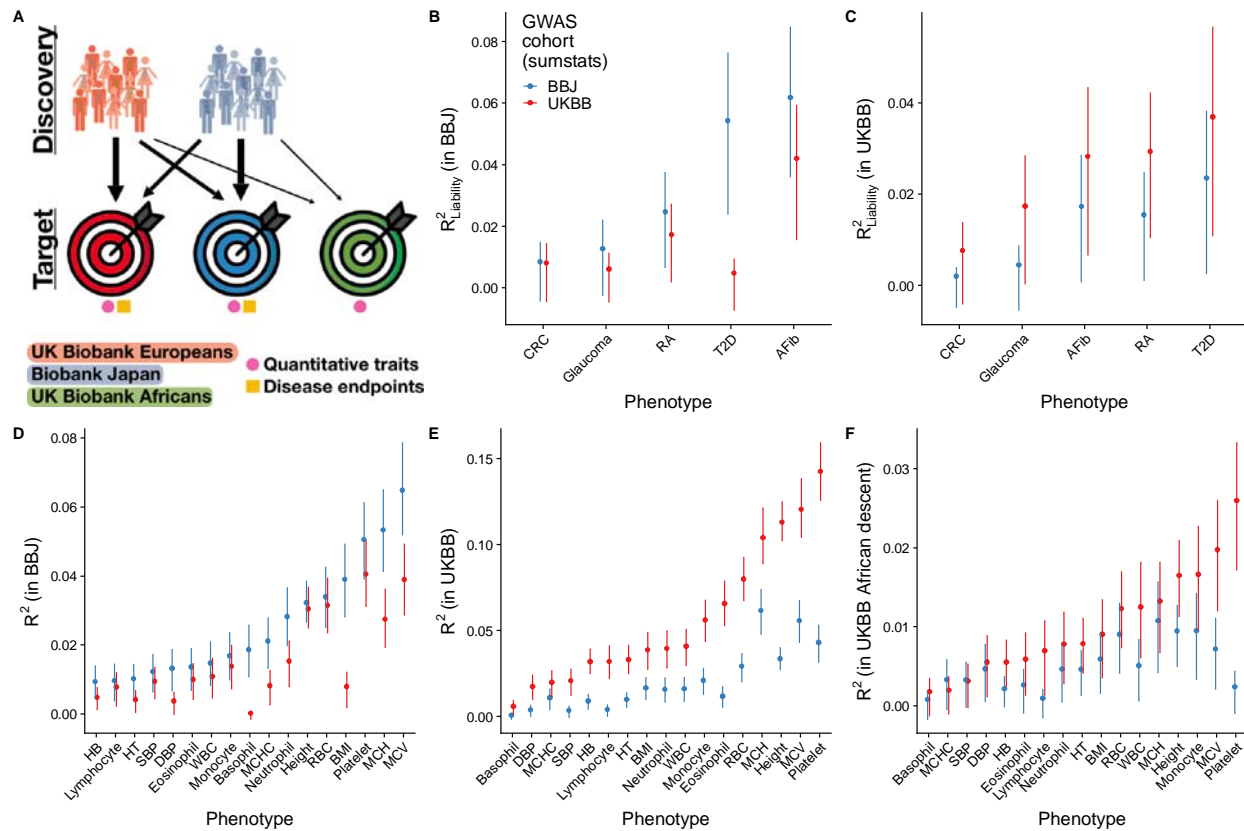

508

509 **Figure 4 – Polygenic risk prediction accuracy in Japanese, British, and African**

510 **descent individuals using independent GWAS of equal sample sizes in the**

511 **BioBank Japan and UK Biobank.** All target prediction cohorts are withheld from the

512 GWAS and thus independent. Sample sizes in each GWAS are identical by design

513 between BBJ and UKBB (**Table S1 and S3**). To optimize signal to noise, each point

514 shows the maximum  $R^2$  (i.e. best predictor) across five p-value thresholds.  $R^2$  values for

515 all p-value thresholds are shown in **Figures S8-S12**. Prediction accuracy tends to be

516 higher in the UK Biobank for quantitative traits than in BioBank Japan and vice versa for

517 disease endpoints, likely because of concomitant phenotype precision and

518 consequently observed heritability for these classes of traits (**Table S5-S7**)<sup>\*\*</sup>.

519 Abbreviations are as follows: AFib = atrial fibrillation, BMI = body mass index, CRC =

520 colorectal cancer, DBP = diastolic blood pressure, Hb = hemoglobin, Ht = Hematocrit,

521 MCH = mean corpuscular hemoglobin, MCHC = mean corpuscular hemoglobin

522 concentration, MCV = mean corpuscular volume, RA = rheumatoid arthritis, RBC = red

523 blood cell count, SBP = systolic blood pressure, T2D = type 2 diabetes, WBC = white

524 blood cell count. A) Explanatory diagram showing the different discovery and target

525 cohorts/populations, and quantitative traits versus disease endpoints. B) Genetic

526 prediction accuracy for five diseases in Japanese individuals using summary statistics

527 from GWAS of independent BioBank Japan versus UK Biobank samples. C) Genetic

528 prediction accuracy for the same five diseases in independent British individuals using

529 summary statistics from GWAS of independent BioBank Japan versus the UK Biobank

530 samples. D) Genetic prediction accuracy for 17 anthropometric and blood panel traits in

531 Japanese individuals using summary statistics from GWAS of independent BioBank

532 Japan versus UK Biobank samples. E) Genetic prediction accuracy for the same 17

533 anthropometric and blood panel traits in independent British individuals using summary

534 statistics from GWAS of independent BioBank Japan versus the UK Biobank samples.

535 F) Genetic prediction accuracy for 17 anthropometric and blood panel traits in African

536 descent individuals in the UK Biobank using summary statistics from GWAS of

537 independent BioBank Japan versus UK Biobank samples.

---

<sup>\*\*</sup> Thalassemia and sickle cell disease are unlikely to explain a significant fraction of these prediction differences, as few individuals have been diagnosed with these disorders via ICD-10 codes (**Table S11**).

## 538 References

- 539 1. Knowles, J. W. & Ashley, E. A. Cardiovascular disease: The rise of the genetic  
540 risk score. *PLoS Med* **15**, e1002546–7 (2018).
- 541 2. Maas, P. *et al.* Breast Cancer Risk From Modifiable and Nonmodifiable Risk  
542 Factors Among White Women in the United States. *JAMA Oncol* **2**, 1295–8  
543 (2016).
- 544 3. Mavaddat, N. *et al.* Polygenic Risk Scores for Prediction of Breast Cancer and  
545 Breast Cancer Subtypes. *The American Journal of Human Genetics* 1–42 (2018).  
546 doi:10.1016/j.ajhg.2018.11.002
- 547 4. Schumacher, F. R. *et al.* Association analyses of more than 140,000 men identify  
548 63 new prostate cancer susceptibility loci. *Nat Genet* 1–13 (2018).  
549 doi:10.1038/s41588-018-0142-8
- 550 5. Khera, A. V. *et al.* Genome-wide polygenic score to identify a monogenic risk-  
551 equivalent for coronary disease. (2017). doi:10.1101/218388
- 552 6. Kullo, I. J. *et al.* Incorporating a Genetic Risk Score Into Coronary Heart Disease  
553 Risk Estimates: Effect on Low-Density Lipoprotein Cholesterol Levels (the MI-  
554 GENES Clinical Trial). *Circulation* **133**, 1181–1188 (2016).
- 555 7. Paquette, M. *et al.* Polygenic risk score predicts prevalence of cardiovascular  
556 disease in patients with familial hypercholesterolemia. *Journal of Clinical*  
557 *Lipidology* **11**, 725–732.e5 (2017).
- 558 8. Natarajan, P. *et al.* Polygenic Risk Score Identifies Subgroup With Higher Burden  
559 of Atherosclerosis and Greater Relative Benefit From Statin Therapy in the  
560 Primary Prevention Setting Clinical Perspective. *Circulation* **135**, 2091–2101  
561 (2017).
- 562 9. Tikkanen, E., Havulinna, A. S., Palotie, A., Salomaa, V. & Ripatti, S. Genetic risk  
563 prediction and a 2-stage risk screening strategy for coronary heart disease.  
564 *Arterioscler. Thromb. Vasc. Biol.* **33**, 2261–2266 (2013).
- 565 10. Frieser, M. J., Wilson, S. & Vrieze, S. Behavioral Impact of Return of Genetic Test  
566 Results for Complex Disease: Systematic Review and Meta-Analysis. *Health*  
567 *Psychol* **37**, 1134–1144 (2018).
- 568 11. Khera, A. V. *et al.* Genetic Risk, Adherence to a Healthy Lifestyle, and Coronary  
569 Disease. *N Engl J Med* **375**, 2349–2358 (2016).
- 570 12. Khera, A. V. & Kathiresan, S. Genetics of coronary artery disease: discovery,  
571 biology and clinical translation. *Nat Rev Genet* **18**, 331–344 (2017).
- 572 13. Martin, A. R. *et al.* Human Demographic History Impacts Genetic Risk Prediction  
573 across Diverse Populations. *Am. J. Hum. Genet.* **100**, 635–649 (2017).
- 574 14. Scutari, M., Mackay, I. & Balding, D. Using Genetic Distance to Infer the Accuracy  
575 of Genomic Prediction. *PLoS Genet* **12**, e1006288 (2016).
- 576 15. Vilhjálmsson, B. J. *et al.* Modeling Linkage Disequilibrium Increases Accuracy of  
577 Polygenic Risk Scores. *The American Journal of Human Genetics* **97**, 576–592  
578 (2015).
- 579 16. Ware, E. B. *et al.* Heterogeneity in polygenic scores for common human traits. 1–  
580 13 (2017). doi:10.1101/106062

- 581 17. Curtis, D. Polygenic risk score for schizophrenia is more strongly associated with  
582 ancestry than with schizophrenia. *bioRxiv* (2018).  
583 doi:<https://doi.org/10.1101/287136>
- 584 18. Ripke, S. *et al.* Biological insights from 108 schizophrenia-associated genetic loci.  
585 *Nature* **511**, 421–427 (2014).
- 586 19. Belsky, D. W. *et al.* Development and Evaluation of a Genetic Risk Score for  
587 Obesity. *Biodemography and Social Biology* **59**, 85–100 (2013).
- 588 20. Domingue, B. W., Belsky, D. W., Conley, D., Harris, K. M. & Boardman, J. D.  
589 Polygenic Influence on Educational Attainment. *AERA Open* **1**,  
590 233285841559997–13 (2015).
- 591 21. Wedow, R. *et al.* Gene discovery and polygenic prediction from a genome-wide  
592 association study of educational attainment in 1.1 million individuals. *Nat Genet*  
593 **92**, 109 (2018).
- 594 22. Vassos, E. *et al.* An Examination of Polygenic Score Risk Prediction in Individuals  
595 With First-Episode Psychosis. *Biological Psychiatry* **81**, 470–477 (2017).
- 596 23. Akiyama, M. *et al.* Genome-wide association study identifies 112 new loci for  
597 body mass index in the Japanese population. *Nat Genet* **49**, 1458–1467 (2017).
- 598 24. Li, Z. *et al.* Genome-wide association analysis identifies 30 new susceptibility loci  
599 for schizophrenia. *Nature Publishing Group* **49**, 1576–1583 (2017).
- 600 25. Need, A. C. & Goldstein, D. B. Next generation disparities in human genomics:  
601 concerns and remedies. *Trends in Genetics* **25**, 489–494 (2009).
- 602 26. Popejoy, A. B. & Fullerton, S. M. Genomics is failing on diversity. *Nature* **538**,  
603 161–164 (2016).
- 604 27. Morales, J. *et al.* A standardized framework for representation of ancestry data in  
605 genomics studies, with application to the NHGRI-EBI GWAS Catalog. 1–10  
606 (2018). doi:10.1186/s13059-018-1396-2
- 607 28. Rosenberg, N. A. *et al.* Genome-wide association studies in diverse populations.  
608 *Nat Rev Genet* **11**, 356–366 (2010).
- 609 29. Sham, P. C., Cherny, S. S., Purcell, S. & Hewitt, J. K. Power of linkage versus  
610 association analysis of quantitative traits, by use of variance-components models,  
611 for sibship data. *The American Journal of Human Genetics* **66**, 1616–1630  
612 (2000).
- 613 30. 1000 Genomes Project Consortium *et al.* A global reference for human genetic  
614 variation. *Nature* **526**, 68–74 (2015).
- 615 31. Consortium, T. S. 2. D. Sequence variants in SLC16A11 are a common risk factor  
616 for type 2 diabetes in Mexico. *Nature* **506**, 97–101 (2014).
- 617 32. Estrada, K. *et al.* Association of a Low-Frequency Variant in HNF1A With Type 2  
618 Diabetes in a Latino Population. *JAMA* **311**, 2305–2314 (2014).
- 619 33. Haiman, C. A. *et al.* Genome-wide association study of prostate cancer in men of  
620 African ancestry identifies a susceptibility locus at 17q21. *Nat Genet* **43**, 570–573  
621 (2011).
- 622 34. Genovese, G. *et al.* Association of trypanolytic ApoL1 variants with kidney  
623 disease in African Americans. *Science* **329**, 841–845 (2010).
- 624 35. Liu, J. Z. *et al.* Association analyses identify 38 susceptibility loci for inflammatory  
625 bowel disease and highlight shared genetic risk across populations. *Nat Genet*  
626 **47**, 979–986 (2015).

- 627 36. Carlson, C. S. *et al.* Generalization and Dilution of Association Results from  
628 European GWAS in Populations of Non-European Ancestry: The PAGE Study.  
629 *PLoS Biol* **11**, e1001661 (2013).
- 630 37. Easton, D. F. *et al.* Genome-wide association study identifies novel breast cancer  
631 susceptibility loci. *Nature* **447**, 1087–1093 (2007).
- 632 38. Mahajan, A. *et al.* Genome-wide trans-ancestry meta-analysis provides insight  
633 into the genetic architecture of type 2 diabetes susceptibility. *Nat Genet* **46**, 234–  
634 244 (2014).
- 635 39. Waters, K. M. *et al.* Consistent Association of Type 2 Diabetes Risk Variants  
636 Found in Europeans in Diverse Racial and Ethnic Groups. *PLoS Genet* **6**,  
637 e1001078 (2010).
- 638 40. Lam, M. *et al.* Comparative genetic architectures of schizophrenia in East Asian  
639 and European populations. 1–41 (2018). doi:10.1101/445874
- 640 41. McCarthy, S. *et al.* A reference panel of 64,976 haplotypes for genotype  
641 imputation. *Nat Genet* **48**, 1279–1283 (2016).
- 642 42. Huang, H. *et al.* Fine-mapping inflammatory bowel disease loci to single-variant  
643 resolution. *Nature* **547**, 173–178 (2017).
- 644 43. Berg, J. J. *et al.* Reduced signal for polygenic adaptation of height in UK Biobank.  
645 1–44 (2018). doi:10.1101/354951
- 646 44. Sohail, M. *et al.* Signals of polygenic adaptation on height have been  
647 overestimated due to uncorrected population structure in genome-wide  
648 association studies. 1–44 (2018). doi:10.1101/355057
- 649 45. Kerminen, S. *et al.* Geographic variation and bias in polygenic scores of complex  
650 diseases and traits in Finland: (2018). doi:10.1101/485441
- 651 46. Ge, T., Chen, C.-Y., Neale, B. M., Sabuncu, M. R. & Smoller, J. W. Phenome-  
652 wide heritability analysis of the UK Biobank. *PLoS Genet* **13**, e1006711–21  
653 (2017).
- 654 47. Inouye, M. *et al.* Genomic Risk Prediction of Coronary Artery Disease in 480,000  
655 Adults: Implications for Primary Prevention. *J. Am. Coll. Cardiol.* **72**, 1883–1893  
656 (2018).
- 657 48. Pourcain, B. S. *et al.* ASD and schizophrenia show distinct developmental profiles  
658 in common genetic overlap with population-based social communication  
659 difficulties. *Molecular Psychiatry* 1–8 (2016). doi:10.1038/mp.2016.198
- 660 49. Novembre, J. & Barton, N. H. Tread Lightly Interpreting Polygenic Tests of  
661 Selection. *Genetics* **208**, 1351–1355 (2018).
- 662 50. Henn, B. M., Botigué, L. R., Bustamante, C. D., Clark, A. G. & Gravel, S.  
663 Estimating the mutation load in human genomes. *Nat Rev Genet* **16**, 333–343  
664 (2015).
- 665 51. Li, D., Zhao, H. & Gelernter, J. Strong protective effect of the aldehyde  
666 dehydrogenase gene (ALDH2) 504lys (\*2) allele against alcoholism and alcohol-  
667 induced medical diseases in Asians. *Human Genetics* **131**, 725–737 (2011).
- 668 52. Zhu, Z. *et al.* Dominance Genetic Variation Contributes Little to the Missing  
669 Heritability for Human Complex Traits. *The American Journal of Human Genetics*  
670 **96**, 377–385 (2015).
- 671 53. Paré, G., Mao, S. & Deng, W. Q. A machine-learning heuristic to improve gene  
672 score prediction of polygenic traits. *Sci Rep* **7**, 12665 (2017).

- 673 54. Martin, A. R. *et al.* An Unexpectedly Complex Architecture for Skin Pigmentation  
674 in Africans. (2017). doi:10.1101/200139
- 675 55. Hindorff, L. A. *et al.* Prioritizing diversity in human genomics research. *Nature*  
676 *Publishing Group* 1–11 (2017). doi:10.1038/nrg.2017.89
- 677 56. H3Africa Consortium *et al.* Research capacity. Enabling the genomic revolution in  
678 Africa. *Science* **344**, 1346–1348 (2014).
- 679 57. Duncan, L. E. *et al.* Largest GWAS of PTSD (N=20,070) yields genetic overlap  
680 with schizophrenia and sex differences in heritability. *Molecular Psychiatry* (2017).  
681 doi:10.1038/mp.2017.77
- 682 58. Howrigan, D. Details and Considerations of the Uk Biobank GWAS.  
683 [http://www.nealelab.is/blog/2017/9/11/details-and-considerations-of-the-uk-](http://www.nealelab.is/blog/2017/9/11/details-and-considerations-of-the-uk-biobank-gwas)  
684 [biobank-gwas](http://www.nealelab.is/blog/2017/9/11/details-and-considerations-of-the-uk-biobank-gwas) (2017). Available at: (Accessed: 9 November 2017)
- 685 59. Kanai, M. *et al.* Genetic analysis of quantitative traits in the Japanese population  
686 links cell types to complex human diseases. *Nat Genet* 1–16 (2018).  
687 doi:10.1038/s41588-018-0047-6
- 688 60. Liu, S. *et al.* Genomic Analyses from Non-invasive Prenatal Testing Reveal  
689 Genetic Associations, Patterns of Viral Infections, and Chinese Population  
690 History. *Cell* **175**, 347–359.e14 (2018).
- 691 61. Brown, B. C., Ye, C. J., Price, A. L. & Zaitlen, N. Transethnic Genetic-Correlation  
692 Estimates from Summary Statistics. *The American Journal of Human Genetics*  
693 **99**, 76–88 (2016).
- 694 62. Wray, N. R. *et al.* Pitfalls of predicting complex traits from SNPs. *Nature*  
695 *Publishing Group* **14**, 507–515 (2013).
- 696 63. Wray, N. R. *et al.* Research Review: Polygenic methods and their application to  
697 psychiatric traits. *J Child Psychol Psychiatr* **55**, 1068–1087 (2014).
- 698 64. Torkamani, A., Wineinger, N. E. & Topol, E. J. The personal and clinical utility of  
699 polygenic risk scores. *Nat Rev Genet* 1–10 (2018). doi:10.1038/s41576-018-  
700 0018-x
- 701 65. Manrai, A. K., Patel, C. J. & Ioannidis, J. P. A. In the Era of Precision Medicine  
702 and Big Data, Who Is Normal? *JAMA* **319**, 1981–1982 (2018).
- 703 66. Plenge, R. M., Scolnick, E. M. & Altshuler, D. Validating therapeutic targets  
704 through human genetics. *Nature Publishing Group* **12**, 581–594 (2013).
- 705 67. Carroll, M. D., Kit, B. K., Lacher, D. A., Shero, S. T. & Mussolino, M. E. Trends in  
706 lipids and lipoproteins in US adults, 1988-2010. *JAMA* **308**, 1545–1554 (2012).
- 707 68. Rappoport, N. *et al.* Creating ethnicity-specific reference intervals for lab tests  
708 from EHR data. *bioRxiv* (2017). doi:10.1101/213892
- 709 69. Lim, E., Miyamura, J. & Chen, J. J. Racial/Ethnic-Specific Reference Intervals for  
710 Common Laboratory Tests: A Comparison among Asians, Blacks, Hispanics, and  
711 White. *Hawaii J Med Public Health* **74**, 302–310 (2015).
- 712 70. Hero, J. O., Zaslavsky, A. M. & Blendon, R. J. The United States Leads Other  
713 Nations In Differences By Income In Perceptions Of Health And Health Care.  
714 *Health Aff* **36**, 1032–1040 (2017).
- 715 71. Gilly, A. *et al.* Very low depth whole genome sequencing in complex trait  
716 association studies. 1–24 (2018). doi:10.1101/169789
- 717 72. Pasaniuc, B. *et al.* Extremely low-coverage sequencing and imputation increases  
718 power for genome-wide association studies. *Nat Genet* **44**, 631–635 (2012).

- 719 73. Martin, A. R., Teferra, S., Möller, M., Hoal, E. G. & Daly, M. J. The critical needs  
720 and challenges for genetic architecture studies in Africa. *Current Opinion in*  
721 *Genetics & Development* **53**, 113–120 (2018).
- 722 74. Coles, E. & Mensah, G. A. Geography of Genetics and Genomics Research  
723 Funding in Africa. *Global Heart* **12**, 173–176 (2017).
- 724 75. Mulder, N. J. *et al.* Development of Bioinformatics Infrastructure for Genomics  
725 Research. *Global Heart* **12**, 91–98 (2017).
- 726
